# Supplementary material
Source: PubMed Central journal article supplement (PMC8363292)
Supplement: jci-131-141083-s196.pdf [file jci-131-141083-s196.pdf]

1 **Supplemental Methods**

2

3 **Bioinformatic analysis**

4 For ‘The Cancer Genome Atlas’ (TCGA) dataset Agilent-4502A microarray, data of 488  
5 glioblastoma patients and associated clinical data were downloaded from GlioVis data  
6 portal (<https://gliovis.bioinfo.cnio.es>) (86). Cohorts were split into 2 groups of patients  
7 defined by the level of *SLIT2* expression, using median expression as cutoff. Overall  
8 survival (in months) was used to estimate survival distributions using the Kaplan–Meier  
9 method and the distributions were compared using the log-rank test.

10 For ‘The Cancer Genome Atlas’ (TCGA) dataset, RNAseqV2 normalized data (level 3,  
11  $\log_2(x+1)$  transformed RSEM normalized count, version 2017-10-13) of 151 primary  
12 glioblastoma multiforme patients (TCGA Glioblastoma (GBM)) and associated  
13 molecular GBM subtypes and clinical data were downloaded from the cBioPortal website  
14 datapages ([https://www.cbioportal.org/study/summary?id=gbm\\_tcga](https://www.cbioportal.org/study/summary?id=gbm_tcga)). The cohorts were  
15 split into 2 groups of patients defined by the median level of *SLIT2* expression. Overall  
16 survival (in months) was used to estimate survival distributions using the Kaplan–Meier  
17 method and the distributions were compared using the log-rank test.

18

19 **Patient Samples**

20 Frozen tumors samples were obtained from 25 patients after informed consent and  
21 approval by UZ Leuven ethical committee for the Brain-Tumor-Imm-2014 study; and  
22 tumor RNA was obtained from 104 patients of the Pitié-Salpêtrière tumor bank  
23 Onconeurotek.

24 RNA was purified from liquid nitrogen frozen tissue samples using RNeasy-kit (Qiagen).  
25 0.5µg of RNA were reverse transcribed using SuperScript IV Reverse Transcriptase and  
26 Random Primers (Invitrogen) for qPCR reactions.  
27 For the patient samples analyzed in Figure 1C/D and Supplemental Figure 1 I-N, central  
28 review histopathology of the patients classified the samples as follows:  
29 45 patients were diagnosed with glioblastoma multiforme (GBM) grade IV, 18 patients  
30 with primary anaplastic oligodendroglioma grade III, 6 patients with primary anaplastic  
31 astrocytoma grade III, 1 patient with primary anaplastic oligoastrocytoma grade III, 16  
32 patients with grade III mixed anaplastic gliomas, 26 patients with primary  
33 oligodendroglioma grade II, 1 patient with recurrent oligodendroglioma grade II, 4  
34 patients with grade II astrocytomas, 9 patients with grade II mixed gliomas, 1 patient with  
35 primary xanthoastrocytoma grade II and 1 patient with primary subependymoma grade I.  
36 Associated IDH-1/2 mutation status and relevant clinical data from all the 129 patients  
37 were used in this study.

38

### 39 **QPCR reactions**

40 Real-time quantitative PCR (qPCR) reactions were performed in duplicate using the  
41 MyIQ real-time PCR system (Bio-Rad), with iQ SYBR Green Supermix (Bio-Rad) and  
42 QuantiTect qPCR primers (Qiagen, Supplemental Table 1). Each reaction contained 10  
43 ng of cDNA and 250 nM forward and reverse primers. Fold changes were calculated  
44 using the comparative CT method.

45

### 46 **Single-cell RNA sequencing analysis**

47 We downloaded the following published datasets for single cell RNA-seq analysis from  
48 GEO: GSE138794, GSE131928, and GSE84465 (87–89). Gene expression matrices were

49 combined and were visualized using the Seurat v3 (90) package in R. Based on the  
50 ElbowPlot function, we chose around 43 principal components for UMAP driven  
51 visualizations. Markers for each cluster were defined from a combination of literature  
52 knowledge and the FindMarkers function in Seurat. For removal of batch effects between  
53 different datasets, we used the harmony package (91).

54

### 55 **Murine Glioma model**

56 Craniotomy and glioblastoma spheroid implantation were done as previously described  
57 (16). Briefly, a 5-mm circle was drilled between sutures of the skull on ketamine/xylazine  
58 anesthetized mice. A 250- $\mu$ m diameter CT-2A or GL261 spheroid was injected in the  
59 cortex and sealed with a glass coverslip. For survival experiments involving PD-1 and 4-  
60 1BB inhibition, tumor cells were inoculated as cell suspension in the mice striatum  
61 instead as cortical spheroids as previously described (60). Following intramuscular  
62 administration of analgesic (buprenorphine 1 mg/kg), mice were placed in a heated cage  
63 until full recovery.

64 For Temozolomide (Sigma) treatment, mice were injected intraperitoneally with 40mg/kg  
65 in 0.2 mL of PBS at days 7, 11, 15 and 19 after tumor implantation. For anti-PD1 (clone  
66 RMP1-14, BioXCell) and anti-4-1BB (clone LOB12.3, BioXCell) treatment, glioma-  
67 bearing mice were injected intraperitoneally with 0.2 mg of antibodies on days 7, 9, 11  
68 and 13 after tumor implantation.

69 For Robo1Fc (R&D Systems) treatment, 1-week growth glioma-bearing mice were  
70 injected intravenously with 2.5 mg/kg of Robo1Fc or human control IgG1 Fc fragment at  
71 days 7, 9, 11, 13 and 15 after tumor implantation. For this experiment, 6 different series  
72 of mice were implanted and treated: 2 for tumor volume measurement and histological  
73 analysis and 4 for survival analysis.

74 At the defined time points, blood samples were obtained by retro-orbital bleeding with  
75 EDTA-coated capillaries and complete blood cell counts were obtained with a HemaVet  
76 (Drew Scientific). 21 or 23 days after tumor implantation, anesthetized mice were  
77 transcardially perfused with 2% PFA solution. The mouse brain was harvested and fixed  
78 overnight in 4% PFA at 4°C. For immunohistochemistry, brains were washed with PBS  
79 and sectioned with a vibratome (200um-400µm sections). Tumor volume was measured  
80 on serial 400µm sections of the whole tumor under a stereo-microscope using Leica  
81 software according to Cavalieri's principle.

82

### 83 **Slit2 shRNA knockdown and overexpression**

84 CT-2A and GL261 glioma cell lines were infected with Slit2 mouse shRNA lentiviral  
85 particles (Locus ID 20563, Origene TL511128V) in accordance with the manufacturer's  
86 instructions. After infection, cells were polyclonally selected by Puromycin and GFP<sup>+</sup>  
87 cells were sorted by FACS. Slit2 knockdown was verified by qPCR and Western Blot  
88 analysis, and cells were implanted after a maximum of 5 passages. For Slit2 re-  
89 expression, shSlit2 CT-2A cells were infected with SLIT2 (NM\_004787) Human Tagged  
90 ORF Clone Lentiviral Particle (Origene) in accordance with manufacturer's instructions.  
91 Cells were implanted after a maximum of 3 passages.

92

### 93 **FDG PET-CT Imaging**

94 Mice were fasted overnight with free access to water. Mice were anesthetized with  
95 isoflurane, weighed and glycemia was measured in blood drawn from the caudal ventral  
96 artery using an Accu-Chek® Aviva Nano A (Accu-Chek, France). A 26G needle catheter  
97 (Fischer Scientific, France) connected to a 5cm polyethylene tubing (Tygon Microbore  
98 Tubing, 0.010" x 0.030"OD; Fisher Scientific, France) was inserted in the caudal vein for

99 radiotracer injection.  $9.2 \pm 1.5$  MBq of 2'-deoxy-2'-[18F]fluoro-D-glucose (FDG;  
100 Advanced Applied Applications, France) in 0.2mL saline was injected via the catheter.  
101 Mice were left on a warming pad for 30 min and then installed into the PET-CT dedicated  
102 bed. Respiration and body temperature were registered. Body temperature was  
103 maintained at  $34 \pm 2$  °C and anesthesia was controlled on the breathing rate throughout the  
104 entire PET-CT examination. CT was acquired in a PET-CT scanner (nanoScan PET-CT;  
105 Mediso Medical Imaging Systems, Hungary) using the following acquisition parameters:  
106 semi-circular mode, 50kV tension, 720 projections full scan, 300ms per projection,  
107 binning 1:4. CT projections were reconstructed by filtered retro-projection (filter: Cosine;  
108 Cutoff: 100%) using the software Nucline 3.00.010.0000 (Mediso Medical Imaging  
109 Systems, Hungary). 55 min post tracer injection, PET data were collected for 10 min in  
110 list mode and binned using a 5ns time window, with a 400-600keV energy window and  
111 a 1:5 coincidence mode. Data were reconstructed using the Tera-Tomo reconstruction  
112 engine (3D-OSEM based manufactured customized algorithm) with expectation  
113 maximization iterations, scatter and attenuation correction. Volumes-of-interest (VOI)  
114 were delineated on the tumor and the contralateral brain on PET/CT fusion slices using  
115 the PMOD software package (PMOD Technologies Ltd, Zürich, Switzerland). Total FDG  
116 uptake was estimated as the product from the volume by the mean uptake of the  
117 segmented region.

118

#### 119 **Patient-derived GBM xenograft model (PDX)**

120 N15-0460 patient-derived cell line (PDCL) was established by Gliotex team from GBM  
121 tissue sample that was provided by the neuropathology laboratory of Pitie-Salpetriere  
122 University Hospital, and obtained as part of routine resections from patients under their  
123 informed consent (ethical approval number AC-2013-1962). The parental tumor was

124 IDH-WT and MGMT methylated. Cells are cultivated in DMEM/F12 supplemented with  
125 B27, EGF (20 ng/ml), FGF (20 ng/ml), penicillin/streptomycin 1% and plasmocin 0.2%,  
126 and dissociated with Accutase. Cells were transduced with luciferase/mKate2 lentiviral  
127 particles (in-house produced) at MOI of 3 then shRNA-GFP lentiviral particles (SLIT2,  
128 Locus ID 9353, Origene TL309262V) at MOI of 3. After infection, cells were  
129 polyclonally selected by Puromycin and mKate<sup>+</sup> and GFP<sup>+</sup> cells were sorted by FACS  
130 (BioRad S3e Cell Sorter).  
131 For intracranial xenografts,  $1.4 \times 10^5$  cells were injected in 2  $\mu$ L of HBSS in Hsd:Athymic  
132 Nude-Foxn1nu mice (Envigo) by stereotaxic injection at Bregma AP : +0.1 ; ML : -0.15  
133 ; DV : -0.25 under isoflurane anesthesia (protocol #17503 2018111214011311 v5).  
134 Tumor growth was monitored every 15 days by bioluminescence imaging following  
135 100 $\mu$ L luciferin subcutaneous injection at 30mg/mL, and image acquisition with IVIS®  
136 Spectrum *in vivo* imaging system (Perkin Elmer). The development of tumors (Tumor  
137 take) was evaluated by determining the day when bioluminescence signal doubled  
138 compared to the first bioluminescence measured 8 days post-graft.

139

#### 140 ***In vitro* spheroid formation and invasion assays**

141 For spheroid formation, 1,000 N15-0460 shCTRL or shSLIT2 cells were plated in non-  
142 adherent 96 well plates for 48hs and then imaged by fluorescence using a standard FITC  
143 filter to detect endogenous GFP. For invasion assays, spheroids were then resuspended in  
144 fibrinogen solution (2.5 mg/ml fibrinogen (Sigma) in DMEM/F12 supplemented with  
145 B27, EGF (20 ng/ml), FGF (20 ng/ml) and 50 mg/ml aprotinin (Sigma)) and clotted with  
146 1 U thrombin (Sigma-Aldrich) for 20 min at 37 °C. Cultures were topped with medium  
147 and incubated at 37 °C, 5% CO<sub>2</sub>. After 1 and 2 days, cultures were imaged by  
148 fluorescence using a standard FITC filter.

149

150 **Extraction of tumor-associated macrophages, lymphocytes and endothelial cells and**  
151 **qPCR analysis**

152 Ketamine/Xylazine anaesthetized tumor-bearing mice were transcardially perfused with  
153 30 ml of ice-cold PBS. Tumors were harvested and incubated with DMEM containing  
154 2.5 mg/ml collagenase D, and 5 U/ml DNase I for 20 min at 37°C. The digested tissue  
155 was passed through a 40µm nylon cell strainer (Falcon) and red blood cells were lysed  
156 (Red Blood Cells Lysis buffer, Merck).

157 After blocking with mouse FcR Blocking Reagent (MACS Miltenyi Biotec) cells were  
158 stained with the following monoclonal antibodies: anti-CD45 BUV 805 (Clone 30-F11,  
159 BD), anti-CD11b BV450 (Clone M1/70, BD), anti-CD31 PE/CF594 (Clone 390, BD),  
160 and anti-CD3 BUV395 (Clone 145-2C11, BD), anti-CD4 PE (Clone GK1.5, BD) and  
161 anti-CD8 PerCP/Cy5.5 (Clone 53-6.7, BD) antibodies. TAMs (CD45<sup>+</sup>CD11b<sup>+</sup>CD3<sup>-</sup>),  
162 TALs (CD45<sup>+</sup>CD11b<sup>-</sup>CD3<sup>+</sup>, either CD4<sup>+</sup> or CD8<sup>+</sup>), endothelial cells (CD45<sup>-</sup>CD31<sup>+</sup>) and  
163 tumor cells (CD45<sup>-</sup>GFP<sup>+</sup>) were sorted on a BD FACS Aria II. Cell viability after FACS  
164 analysis was determined using eBioscience Fixable Viability Die eFluor 780 (Invitrogen)  
165 and found to be >90%. The cells were then shock-frozen in liquid nitrogen and stored at  
166 -80°C until further use.

167 Total RNA was isolated using the NucleoSpin RNA XS kit from Macherey-Nagel. For  
168 protein extraction, frozen cells were resuspended in RIPA Buffer with protease and  
169 phosphatase inhibitors and sonicated 3x for 15 seconds each time. Protein concentration  
170 was determined by the BCA method and ELISAs were performed according to the  
171 manufacturer's instructions (Mouse VEGF, IL-10 and IFNγ DuoSet ELISA, R&D  
172 Systems).

173

174 **Flow-cytometric staining of tumor-infiltrating immune cells**

175 Day 21 CT-2A shCTRL and shSlit2 tumors were harvested and dissociated as described.  
176 Single cell suspensions were incubated with anti-CD45 Alexa Fluor 594 (Clone 30-F11,  
177 R&D Systems) or BUV805 (Clone 30-F11, BD), anti-CD11b BV450 (Clone M1/70, BD),  
178 anti-Ly6G PerCP/Cy5.5 (Clone 1A8, BD), anti-Ly6C APC/Cy7 (Clone AL-21, BD), anti-  
179 F4/80 PE (Clone BM8, BD), anti-CD11c (Clone N418, APC), anti-MHCII PE/Cy7  
180 (Clone M5/114.15.2, Biolegend), anti-MRC1 BV711 (Clone C068C2, Biolegend), anti-  
181 CD3 PE/Cy5 (Clone 145-2C11, Biolegend), anti-CD19 PE/Texas Red (Clone 1D3, BD),  
182 anti-CD4 PE (Clone GK1.5, Biolegend), and anti-CD8 PerCP/Cy5.5 (Clone 53-6.7,  
183 Biolegend). As a control, cells were stained with the appropriate isotype control. Data  
184 acquisition was performed on BD LSRFortessa X20 and analysis was performed with  
185 FlowJo\_V10.

186

187 **Cell lines**

188 RAW264.7 mouse macrophages, CT-2A and GL261 glioma cells were cultured in  
189 DMEM Gluta-MAX (Gibco) supplemented with 10% FBS (Gibco), 1%  
190 penicillin/streptomycin (Gibco) until a maximum of 10 passages. Glioma spheroids were  
191 obtained by seeding the glioma cells for 48 h on non-adherent culture dishes.

192

193 **Cell Growth Determination**

194 Cell viability was determined using the Cell Growth Determination Kit, MTT based  
195 (Sigma) according to manufacturer's instructions. Briefly, 20.000 cells were plated in 24  
196 well plates and grown in normal supplemented medium over 3 days, for determination of  
197 their growth curve. After each 24-hour period, cells were incubated with 10% MTT  
198 solution for 3 hours, then MTT formazan crystals were dissolved and absorbance was



199 spectrophotometrically measure at 570 nm. Background absorbance measured at 690 nm  
200 was subtracted to the first value.

201 For TMZ sensitivity test, cells were treated for 24 hours with increasing concentrations  
202 of TMZ in serum-free medium. The same procedure was performed on untreated cells,  
203 and values were normalized and expressed in comparison to untreated cells.

204

#### 205 **Vessel perfusion and permeability assay**

206 Glioma-bearing mice from 3 weeks growth were anesthetized and injected intravenously  
207 with 100  $\mu$ L of Alexa Fluor 647 labeled 10,000 MW dextran (Life Technologies). Blood  
208 vessel perfusion was visualized in vivo using the live imaging settings.

209 For Miles assay, glioma-bearing mice were anesthetized and injected intravenously with  
210 100  $\mu$ L 1% Evan's blue solution (Sigma). Thirty minutes after injection, mice were  
211 sacrificed and transcardially perfused with 2% PFA solution. Dissected tumors were  
212 weighed and incubated in formamide solution at 56°C overnight to extract the dye. The  
213 absorbance of the solution was measured with a spectrophotometer at 620 nm. Five mice  
214 per group were analyzed. Data are expressed as fold change compared to shCTRL glioma  
215 growth with tumor weight normalization.

216

#### 217 **MRI**

218 Magnetic resonance imaging (MRI) was performed 21 days after tumor implantation in  
219 mice under Isoflurane anesthesia (2 to 2.5% mixed in ambient air) in a 4.7-T magnetic  
220 resonance scanner (Bruker BioSpec 47/40USR). Brain images were obtained using a  
221 Fast-Spin-Echo (FSE) T2 weighted (TE/TR: 15/2000 ms; matrix: 128 $\times$ 128; slice  
222 thickness: 1 mm; with no gap; 12 averages) and a Spin-Echo (SE) T1 weighted (TE/TR:  
223 15/250 ms; matrix: 128 $\times$ 128; slice thickness: 1 mm; with no gap; 12 averages) sequences

224 in axial and coronal planes. T1 weighted images were acquired before and T2 weighted  
225 images after intraperitoneal injection of gadoteric acid (200uL, 0.01mmol/mL, 0.05  
226 M/Kg).

227

### 228 **Immunofluorescence staining**

229 Vibratome sections of tumors injected in ROSA<sup>mTmG</sup> reporter mice were blocked and  
230 permeabilized in TNBT buffer (0.1 M Tris pH 7.4; NaCl 150 mM; 0.5% blocking reagent  
231 from Perkin Elmer, 0.5% Triton X-100) overnight at 4°C. Tissues were then incubated  
232 with primary antibodies anti-F4/80 (Clone BM8, Life Technologies, 1:100), anti-MRC1  
233 (AF2535, R&D Systems, 1:100), anti-CD3 (Clone 17A2, R&D Systems, 1:100), anti-  
234 MHCII (Clone M5/114.15.2, Thermo Scientific, 1:100), anti-Glut1 (07-1401, Millipore,  
235 1:200), anti-Iba1 (019-19741, Wako, 1:200), anti-pH2AX (8718, Cell Signaling, 1:100)  
236 diluted in TNBT overnight at 4°C, washed in TNT buffer (0.1 M Tris pH 7.4; NaCl 150  
237 mM; 0.5% Triton X-100) at least 7 times and incubated with appropriate Alexa Fluor 647  
238 conjugated antibody (Life Technologies, 1:400) diluted in TNBT overnight at 4°C.  
239 Samples were then washed at least 7 times in TNT and mounted on slides in fluorescent  
240 mounting medium (Dako). Images were acquired using a Leica SP8 inverted confocal  
241 microscope.

242

### 243 **Soluble Flt-1 binding assay**

244 For detection of VEGF expression, vibratome sections were blocked and permeabilized  
245 in TNBT overnight at 4°C. Tissues were then incubated with 1µg/ml recombinant mouse  
246 soluble Flt-1 FC chimera (321-FL-050, R&D Systems) diluted in TNBT for 2.5 h at room  
247 temperature. Samples were rinsed three times in TNT and subjected to 4% PFA fixation  
248 for 3 min. Samples were washed at least 7 times in TNT and incubated in Alexa Fluor

249 647 coupled anti-human IgG secondary antibodies (Life Technologies, 1:200) diluted in  
250 TNBT overnight at 4°C. Tissues were washed at least 7 times and mounted on slides in  
251 fluorescent mounting medium (Dako). Images were acquired using a Leica SP8 inverted  
252 confocal microscope.

253

#### 254 **Flow-cytometric analysis of tumor-antigen in lymph node immune cells**

255 Deep cervical and mandibular lymph nodes (DCLN and MLN) were dissected from tumor  
256 bearing mice 21 days after injection of CT-2A BFP or CT-2A GFP tumor spheroids. The  
257 2 DCLNs and 6 MLNs of each mice were pooled for analysis. LNs were digested for 30  
258 minutes in 1mg/mL Collagenase I diluted in DMEM at 37°C and after RBC lysis, single  
259 cell suspensions were prepared by filtering dissociated tissue on 40uM nylon cell  
260 strainers. Single cell suspensions were incubated with anti-CD45 APC or BUV805  
261 (Clone 30-F11, BD), anti-CD11b BV650 or BV450 (Clone M1/70, BD) antibodies. As a  
262 control, cells were stained with the appropriate isotype control. Data acquisition was  
263 performed on the BD LSRII Fortessa X20 and analysis was performed with FlowJo\_V10.

264

#### 265 **Primary cell cultures**

266 Bone-marrow derived macrophages (BMDMs) were isolated from C57BL/6 mice by  
267 flushing the femur and tibia with PBS. The bone marrow cells were resuspended in  
268 DMEM GlutaMax (Gibco) containing 1% Pen/Strep (Gibco), 20% FBS (Gibco) and  
269 100 ng/mL M-CSF (R&D Systems). Cells were incubated for 2 days at 37 °C and 5%  
270 CO<sub>2</sub> in non-treated bacterial dishes for adhesion of bone-marrow resident macrophages,  
271 and then changed for treated plastic dishes and culture for 6 days with medium change  
272 every 2 days. Before experiments, cells were starved in serum- and CSF-free medium  
273 overnight. For PI3K $\gamma$  inhibition experiments, cells were pre-treated with 1uM IPI-549 for

274 30 minutes as previously described (1) and then treatments were performed as described  
275 for all other experiments.

276 Microglial cells were obtained as described previously (2, 3). Peritoneal macrophages  
277 (PMs) were isolated from peritoneal lavage as previously described (4).

278

#### 279 **Slit2 ELISA**

280 Slit2 concentrations in mice serum were determined by the sandwich ELISA method with  
281 the DuoSet ELISA Ancillary Reagent Kit 2 (R&D Systems) according to the  
282 manufacturer's instructions, using serum samples obtained either from healthy mice or  
283 from tumor-bearing mice. Rat anti-Human/Mice Slit2 monoclonal antibody (Clone  
284 710305, R&D Systems) was used as capture antibody at a concentration of 1 $\mu$ g/mL and  
285 sheep anti-mouse Slit2 polyclonal antibody (AF5444, R&D Systems) was used as  
286 detection antibody at a concentration of 400ng/mL HRP-linked anti-sheep secondary  
287 antibodies (1:1000) were used for revelation.

288

#### 289 **siRNA transfection**

290 Robo1, Robo2 and control siRNAs were purchased from Origene. We transfected RAW  
291 264.7 macrophages with 10nM final siRNA concentration using siTran1.0 transfection  
292 reagent (Origene), according to the manufacturer's instructions. Cells were used for  
293 experiments 72 h after transfection. For qPCR experiments, RNAs were purified using  
294 RNeasy-kit (Qiagen). 500 or 750 ng of RNA were reverse transcribed using SuperScript  
295 II Reverse Transcriptase and Random Primers (Invitrogen). Quantitative PCR were  
296 assayed as described for patient samples.

297 For adenoviral Robo1 rescue, we used previously described methods (28, 31).

298

299 **Transwell Migration Assay**

300 For chemotactic migration assays with 8.0µm Polycarbonate Membrane Transwell inserts  
301 (Corning Inc), 20.000 primary cells were plated in 125 µL of serum-free DMEM medium  
302 on the top chambers. When stated, 1.000ng/mL of rmSlit2 was also added to the top  
303 chambers. Then, bottom chambers were filled with 500 µL of serum-free DMEM with  
304 chemoattractants (R&D Systems). Cells were cultured overnight at 37°C and 5% CO<sub>2</sub>,  
305 then incubated for 30 minutes with Calcein AM (Invitrogen) to stain live cells. Then the  
306 wells were washed and 10 pictures per well were acquired at 10x magnification using a  
307 Leica DMIRB inverted epifluorescence microscope. Migrated cells per field were  
308 counted using ImageJ software.

309 For Transwell migration assay in direction to tumor cells, 30.000 tumor cells were plated  
310 in the bottom chamber and starved in 500uL of serum-free media for 8 hours before  
311 plating cells on the top chamber.

312

313 **Western blot analysis**

314 Cells were lysed in RIPA lysis buffer including phosphatase and protease inhibitors  
315 (Invitrogen). Equal amounts of proteins were separated on 4–15% Criterion precast gel  
316 (Bio-rad) and transferred on nitrocellulose membrane with Transblot Turbo (Bio-rad).  
317 Then membranes were blocked in 5% non-fat milk in TBS-T for 30 minutes at room  
318 temperature and incubated with primary antibodies against Robo1 (Clone 770506, R&D  
319 Systems, 1:500), Robo2 (AF7118, R&D Systems, 1:500), Actin (Clone AC-74, Sigma,  
320 1:4000), anti-phospo p44/42 MAP kinase (phospho-ERK, 4370, Cell Signaling, 1:1000),  
321 anti-p44/42 MAP kinase (total ERK, 9102, Cell Signaling, 1:1000), anti-pAkt Ser473  
322 (4058, Cell Signaling, 1:1000), anti-Akt (9272, Cell Signaling, 1:1000), anti-pPLCγ Ser  
323 1248 (4510, Cell Signaling, 1:1000), anti-PLCγ (2822, Cell Signaling, 1:1000) overnight

324 at 4°C under agitation. After washing with TBS-T membranes were incubated with proper  
325 HRP-conjugated secondary antibodies for 3 hours at room temperature under agitation.  
326 Western blots were developed with chemiluminescence HRP substrate (Bio-rad) on a  
327 Luminescent image analyser, ChemiDoc XRS+ (Bio-rad).

328

### 329 **Immunoprecipitation**

330 After Slit2 treatments for 15 minutes, BMDMs were lysed using NP40 lysis buffer  
331 (Boston bioproducts, BP-119X) supplemented with protease and phosphatase inhibitor  
332 cocktails (Roche, 11836170001 and 4906845001). Protein concentrations were  
333 quantified by BCA assay (Thermo Scientific, 23225) according to the manufacturer's  
334 instructions. 300ug of protein were diluted in 1ml of NP40 buffer containing protease and  
335 phosphatase inhibitors for each condition. In the meantime, protein A/G magnetic beads  
336 (Thermo fischer, 88802) were washed 5x 10min with NP40 buffer. Protein lysates were  
337 incubated for 2 hours at 4°C under gentle rotation with 10ug of PI3K $\gamma$  antibodies (5405,  
338 Cell Signaling Technologies). Then, 50ul of A/G magnetic beads were added to each  
339 protein lysate for 2 hours at 4°C under gentle rotation. Beads were then isolated using  
340 magnetic separator (Invitrogen) and washed 5 x with NP40 buffer. After the last wash,  
341 supernatants were removed and beads were resuspended in 40ul of Laemmli buffer (Bio-  
342 Rad, 1610747), boiled at 95°C for 5min and loaded onto 4-15% gradient gels. Western  
343 blotting was performed as described above.

344

### 345 **GFP<sup>+</sup> macrophage isolation**

346 We collected mouse femoral bone-marrow (BMs) before the sacrifice of tumor-bearing  
347 mice as previously described for BMDM cultures. In the meantime, rabbit anti-GFP  
348 antibodies (A-21311, Invitrogen) were incubated with sheep anti-rabbit IgG magnetic

349 dynabeads (Invitrogen) in a solution of sterile PBS 0.1%BSA (120ul of beads, 24ul of  
350 antibodies in 12ml PBS 0.1%BSA). Solutions were place under gentle rotation at room  
351 temperature for 2hours to allow proper coupling of antibodies and beads. Coupled beads  
352 were next isolated using a magnetic separator and incubated in the resuspended BMs for  
353 30min. After 5 washes with PBS 0.1%BSA, beads were separated using magnetic  
354 separator and RNA was extracted as previously described using RNeasy-kit (Qiagen).  
355 RNA samples were and reverse transcribed using SuperScript IV RT (Invitrogen) for  
356 gene-deletion verification by qPCR.

357

### 358 **CD3+ T cell depletion**

359 For T cell depletion from the TME, 7-day glioma-bearing mice were injected  
360 intravenously with 0.2 mg of anti-CD3 145-2C11 monoclonal antibody (BioXCell) every  
361 3 days and analyzed at 23 days of tumor growth.

362

### 363 **Supplemental References**

364 1. Kaneda MM et al. PI3K $\gamma$  3 is a molecular switch that controls immune suppression.

365 *Nature* 2016;539(7629). doi:10.1038/nature19834

366 2. Lima FRS et al. Regulation of microglial development: A novel role for thyroid

367 hormone. *J. Neurosci.* 2001;21(6). doi:10.1523/jneurosci.21-06-02028.2001

368 3. do Amaral RF et al. Microglial lysophosphatidic acid promotes glioblastoma

369 proliferation and migration via LPA1 receptor. *J. Neurochem.* [published online ahead

370 of print: 2020]; doi:10.1111/jnc.15097

371 4. Pontes B et al. Membrane Elastic Properties and Cell Function. *PLoS One* 2013;8(7).

372 doi:10.1371/journal.pone.0067708

373

374 **Supplemental Figures**

375

376

377



**Supplemental Figure 1**

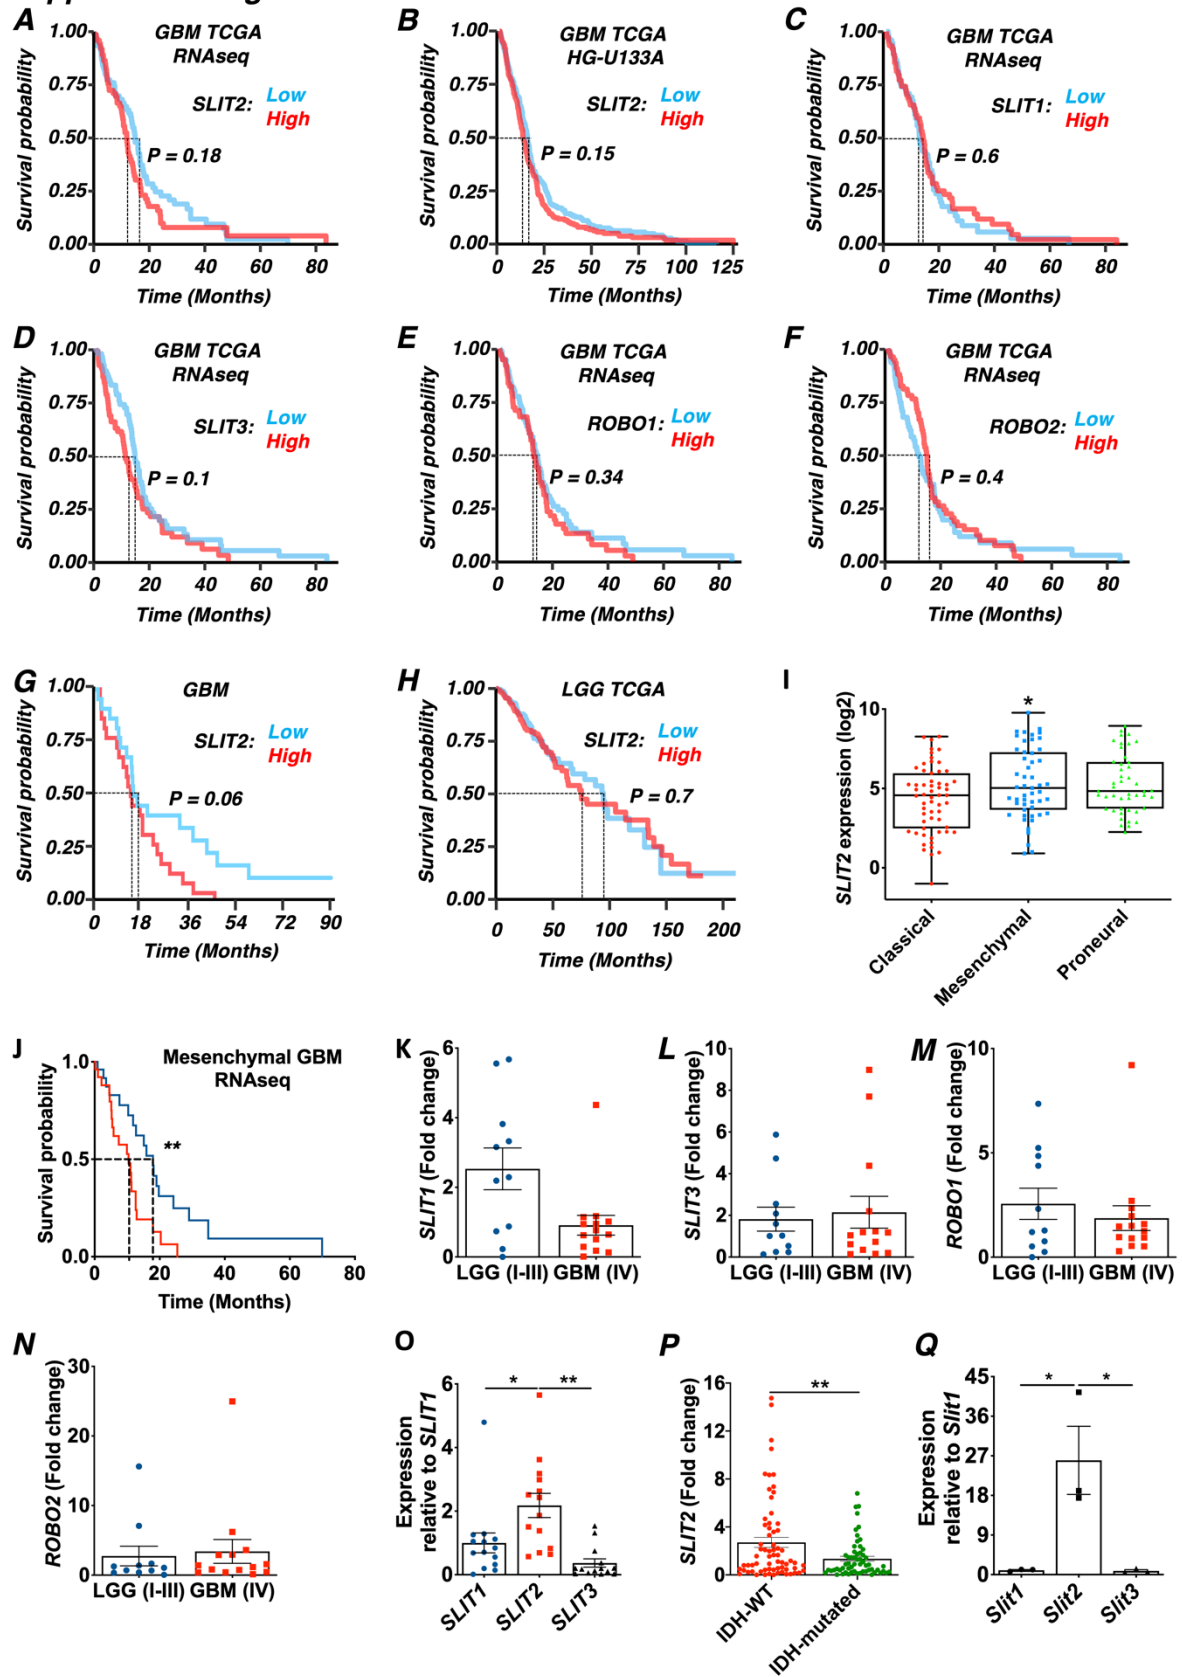

379 **Supplemental Figure 1. Impact of Slit2 on glioma patient survival.**

380 **A.** *In silico* analysis of TCGA glioblastoma RNAseq patient dataset ( $n = 75$  high and 76  
381 low Slit2 expressing patients; O.S., 12.6 months for high expression and 14.9 months for  
382 low expression, log-rank test). **B.** *In silico* analysis of TCGA glioblastoma HG-U133A  
383 patient dataset ( $n = 262$  high and 263 low Slit2 expressing patients; O.S., 11.8 months  
384 for high expression and 13.6 months for low expression, log-rank test). **C-F.** *In silico*  
385 analysis of TCGA glioblastoma RNAseq patient dataset demonstrating that expression of  
386 *SLIT1* (**C**), *SLIT3* (**D**), *ROBO1* (**E**) or *ROBO2* (**F**) do not affect patient survival. **G.**  
387 Survival analysis of GBM patients from (**Figure 1C**) grouped by their levels of *SLIT2*  
388 expression ( $n = 22$  high and 23 low Slit2 expressing patients; O.S., 15.2 months for high  
389 expression and 16.5 months for low expression, log-rank test). **H.** *In silico* analysis of  
390 TCGA LGG patient dataset ( $n = 255$  high and 255 low Slit2 expressing patients; O.S., 75  
391 months for high expression and 94.5 months for low expression, log-rank test). **I.** *In silico*  
392 analysis of TCGA glioblastoma RNAseq patient dataset demonstrating *SLIT2* expression  
393 in different GBM molecular subtypes ( $n = 59$  classical, 51 mesenchymal and 46 proneural  
394 tumors; One-Way ANOVA). **J.** *In silico* analysis of TCGA glioblastoma RNAseq patient  
395 dataset demonstrating that *SLIT2* expression is significantly associated with decreased  
396 patient survival in mesenchymal GBM patients ( $n = 26$  high and 25 low *SLIT2* expressing  
397 patients; O.S., 10.4 months for high expression and 17.9 months for low expression, log-  
398 rank test). **K-N.** qPCR expression of *SLIT1* (**K**), *SLIT3* (**L**), *ROBO1* (**M**) and *ROBO2* (**N**)  
399 in glioma patient samples (GBM,  $n = 45$ ; LGG,  $n = 84$ ; Student's t test). **O.** qPCR  
400 comparison of *SLIT1*, *SLIT2* and *SLIT3* expression in GBM patient samples (Grade IV,  $n$   
401 = 14 patients; One-Way ANOVA). **P.** *SLIT2* qPCR expression in all glioma patient  
402 samples from (**Figure 1C**) classified by their IDH-1/2 status (IDH-WT,  $n = 67$ ; IDH-  
403 mutated,  $n = 59$ ; Student's t test). **Q.** qPCR comparison of *Slit1*, *Slit2* and *Slit3* expression

404 in CT-2A tumors ( $n = 3$  independent tumors, One-Way ANOVA). Data are presented as

405 mean  $\pm$  s.e.m. \*  $P < 0.05$ , \*\*  $P < 0.01$ , \*\*\*  $P < 0.001$ .

406

**Supplemental Figure 2**

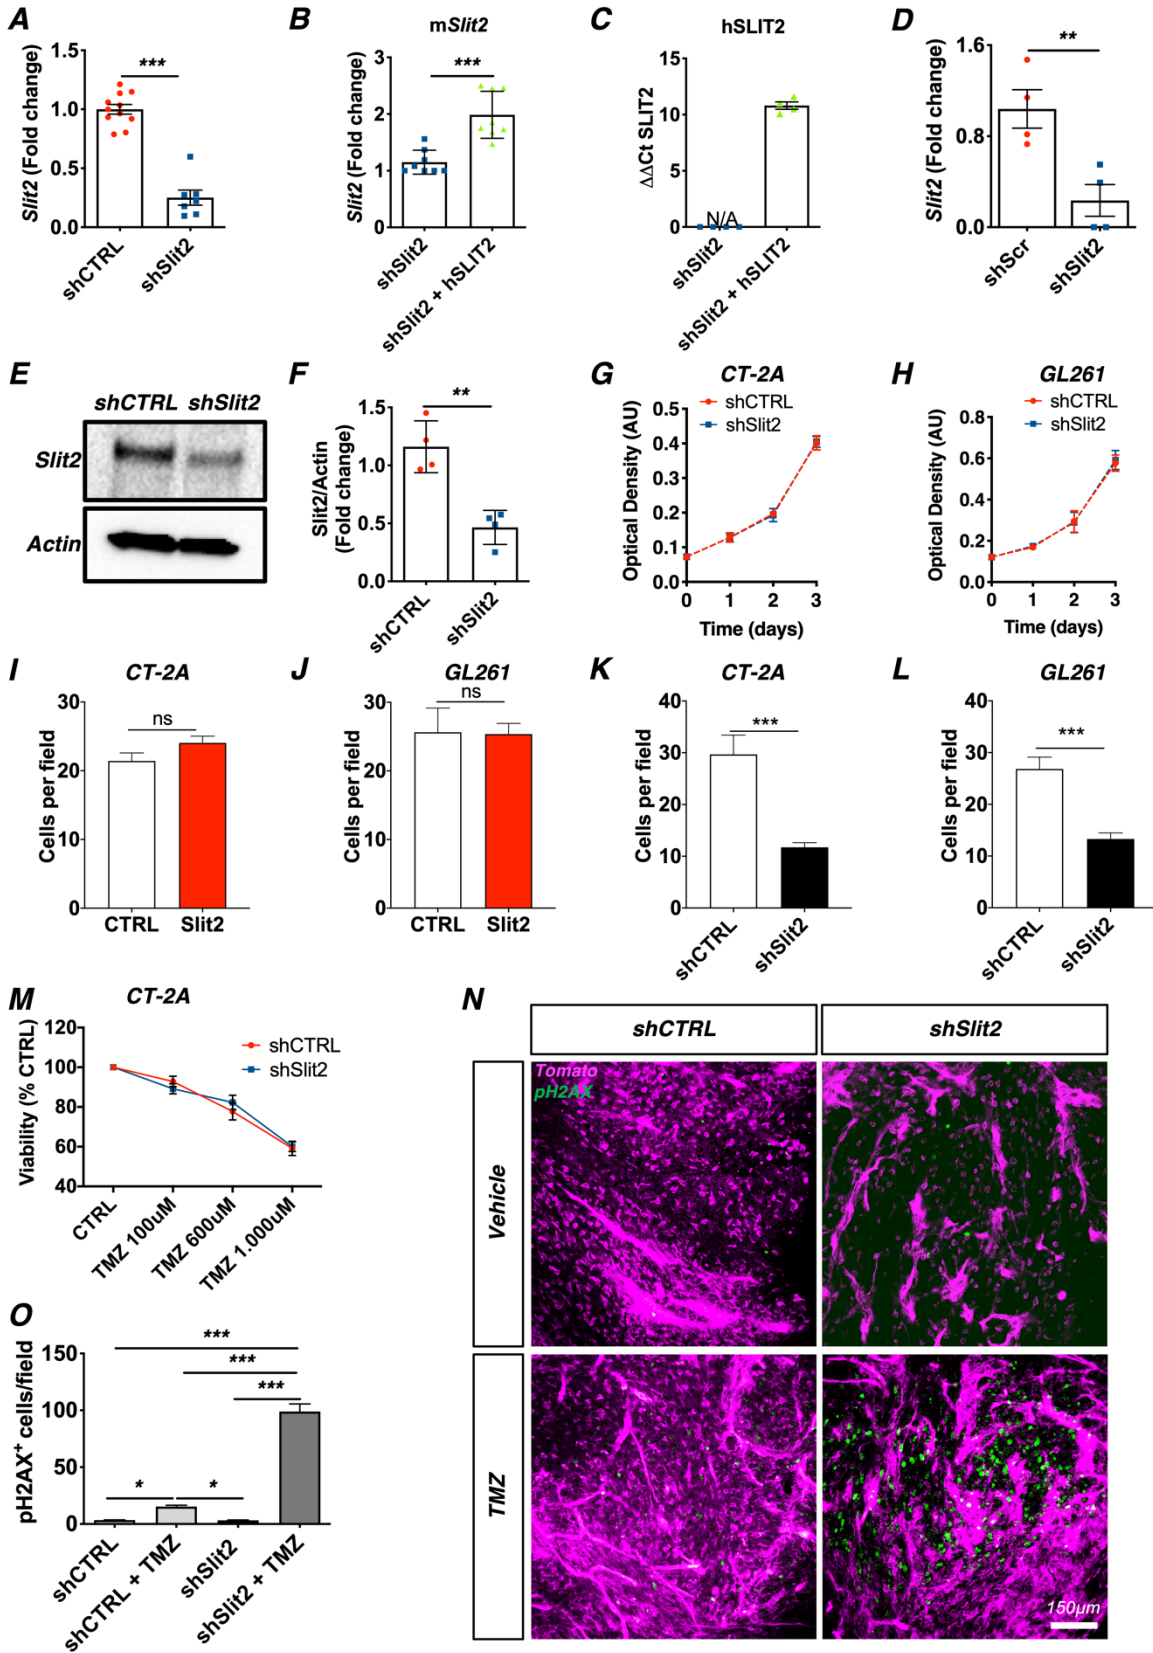

408 **Supplemental Figure 2. Slit2 silencing does not change tumor cell proliferation or**  
409 **sensitivity to TMZ *in vitro*, but increases TMZ-induced tumor cell death *in vivo*.**

410 **A.** *Slit2* qPCR expression in CT-2A shSlit2 and shCTRL ( $n = 10$  shCTRL and  $n = 7$   
411 shSlit, Student's t-test). **B-C.** qPCR analysis of murine (**B**,  $n = 8$ ) and human (**C**,  $n = 4$ )  
412 *Slit2* expression in cells infected with a human SLIT2 construct (Mann-Whitney U test).  
413 **D-F.** qPCR analysis (**D**), western blot analysis (**E**) and protein quantification (**F**) of  
414 shRNA *Slit2* silencing in GL261 cells ( $n = 4$ , Mann-Whitney U test). **G-H.** Kinetics of  
415 shCTRL and shSlit2 treated CT-2A (**G**) and GL261 (**H**) glioma cell growth over 72 hours  
416 in complete medium ( $n = 3$ , multiple comparison linear regression). **I-J.** Transwell assay  
417 quantification of CT-2A (**I**) and GL261 (**J**) cells migration towards a *Slit2* gradient ( $n =$   
418  $4$ , Mann-Whitney U test). **K-L.** Transwell assay quantification of CT-2A (**K**) and GL261  
419 (**L**) shCTRL or shSlit2 cells invasion towards a serum gradient ( $n = 4$ , Mann-Whitney U  
420 test). **M.** *In vitro* shCTRL and shSlit2 treated CT-2A glioma cell response to TMZ  
421 treatment ( $n = 4$ , One-way ANOVA). **N.** Phospho-H2AX (pH2AX) immunostainings  
422 (green) on 23 days tumor sections of CT-2A shCTRL and shSlit2 mice treated or not with  
423 TMZ in order to evaluate double-stranded DNA breaks (pH2AX<sup>+</sup>, green) in response to  
424 TMZ treatment. **O.** Quantification of (**N**) ( $n = 4$  mice per group, 5 fields per tumor, One-  
425 way ANOVA). Data are presented as mean  $\pm$  s.e.m. \*  $P < 0.05$ , \*\*  $P < 0.01$ , \*\*\*  $P <$   
426  $0.001$ .

427

428

429

430

431

432

**Supplemental Figure 3**

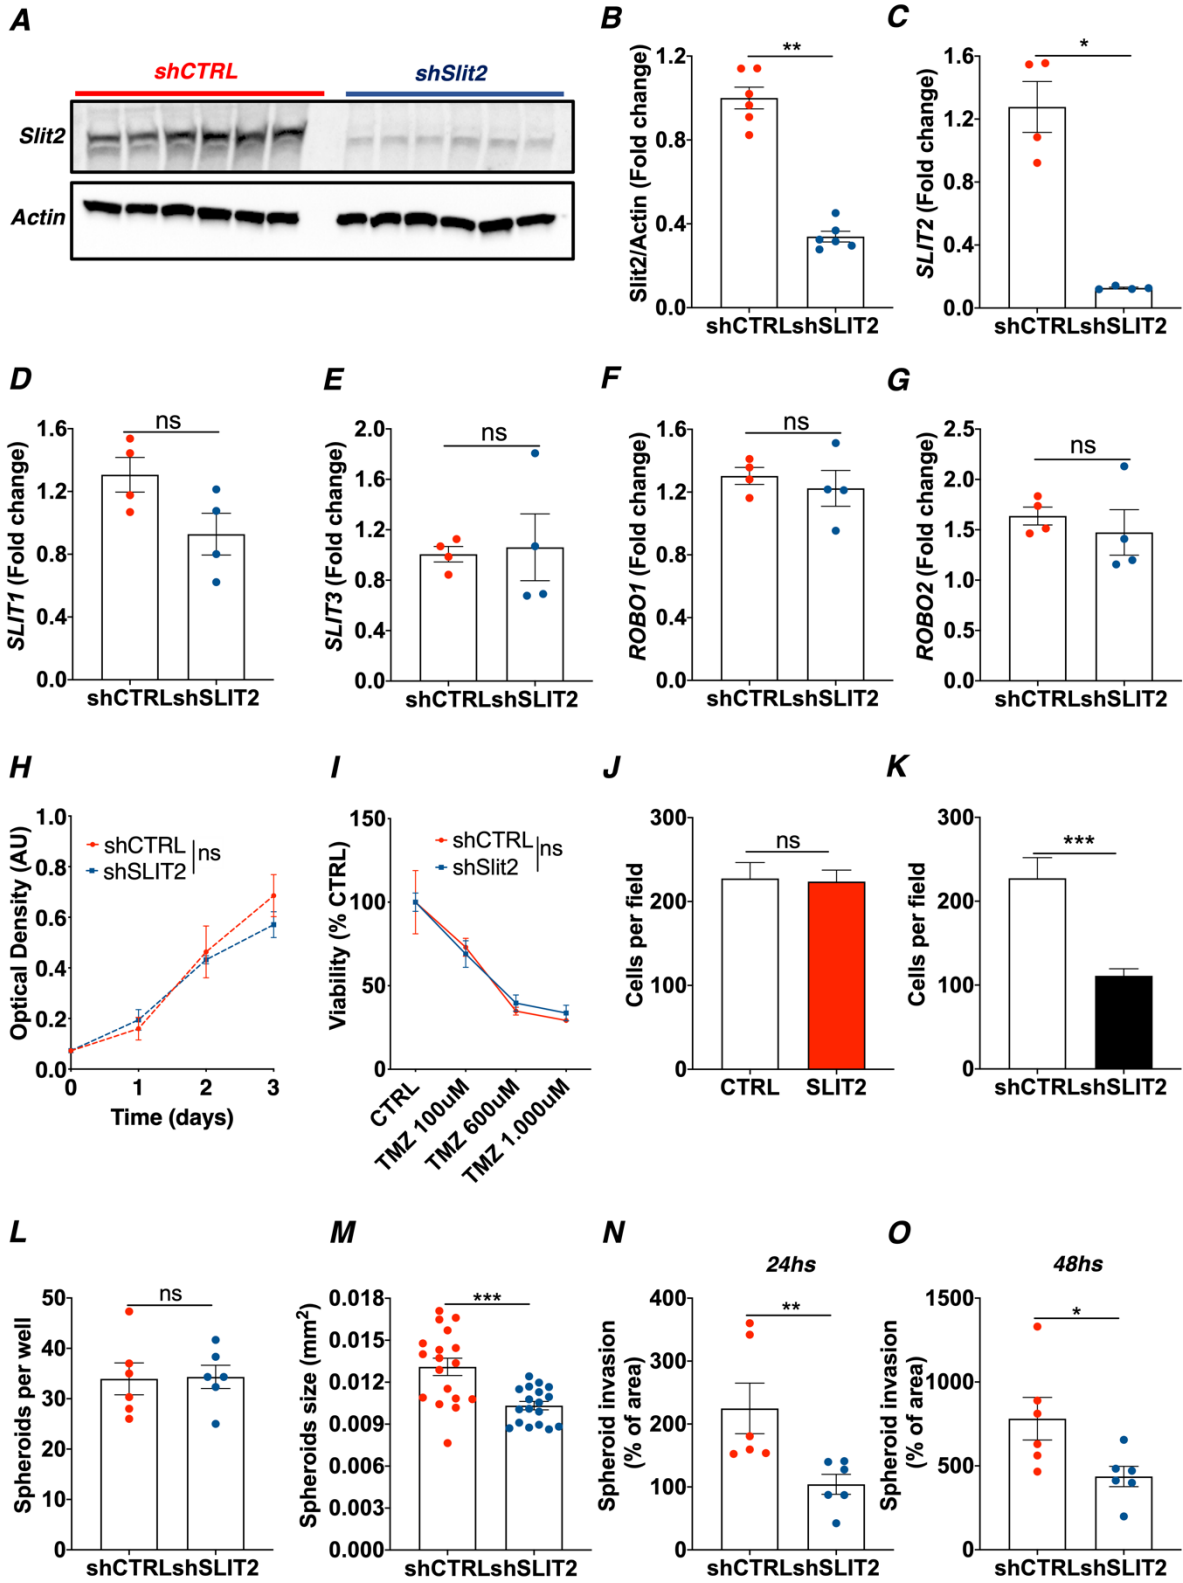

434 **Supplemental Figure 3. Slit2 silencing reduces invasion of Patient-derived GBM**  
435 **cells.**

436 **A-C.** Western blot analysis (**A**), protein quantification (**B**) and qPCR analysis (**C**) of  
437 shRNA *SLIT2* silencing in N15-0460 GBM patient-derived cells ( $n = 6$ , Mann-Whitney  
438 U test). **D-G.** qPCR expression of *SLIT1* (**D**), *SLIT3* (**E**), *ROBO1* (**F**) and *ROBO2* (**G**) in  
439 N15-0460 cells after shRNA *SLIT2* silencing ( $n = 4$ , Mann-Whitney U test). **H.** shCTRL  
440 and shSLIT2 treated N15-0460 growth over 72 hours in complete medium ( $n = 3$ ,  
441 multiple comparison linear regression). **I.** shCTRL and shSLIT2 treated N15-0460 cells  
442 response to TMZ treatment ( $n = 4$ , Two-way ANOVA). **J.** Transwell assay quantification  
443 of N15-0460 cell migration towards a SLIT2 gradient ( $n = 4$ , Mann-Whitney U test). **K.**  
444 Transwell assay quantification of N15-0460 shCTRL or shSLIT2 cell migration towards  
445 a serum gradient ( $n = 4$ , Mann-Whitney U test). **L-M.** Spheroid formation assay  
446 quantification of shCTRL and shSLIT2 N15-0460 cells. Number (**L**) and size (**M**) of  
447 spheroids formed after 48 hours in culture were quantified ( $n = 6$  cultures per group,  
448 Mann-Whitney U test). **N-O.** Quantification of spheroid invasion assay in fibrin gels of  
449 shCTRL and shSLIT2 N15-0460 cells after 24 (**N**) and 48 hours (**O**). Data are presented  
450 as mean  $\pm$  s.e.m. \*  $P < 0.05$ , \*\*  $P < 0.01$ , \*\*\*  $P < 0.001$ .

451

452

453

454

**Supplemental Figure 4**

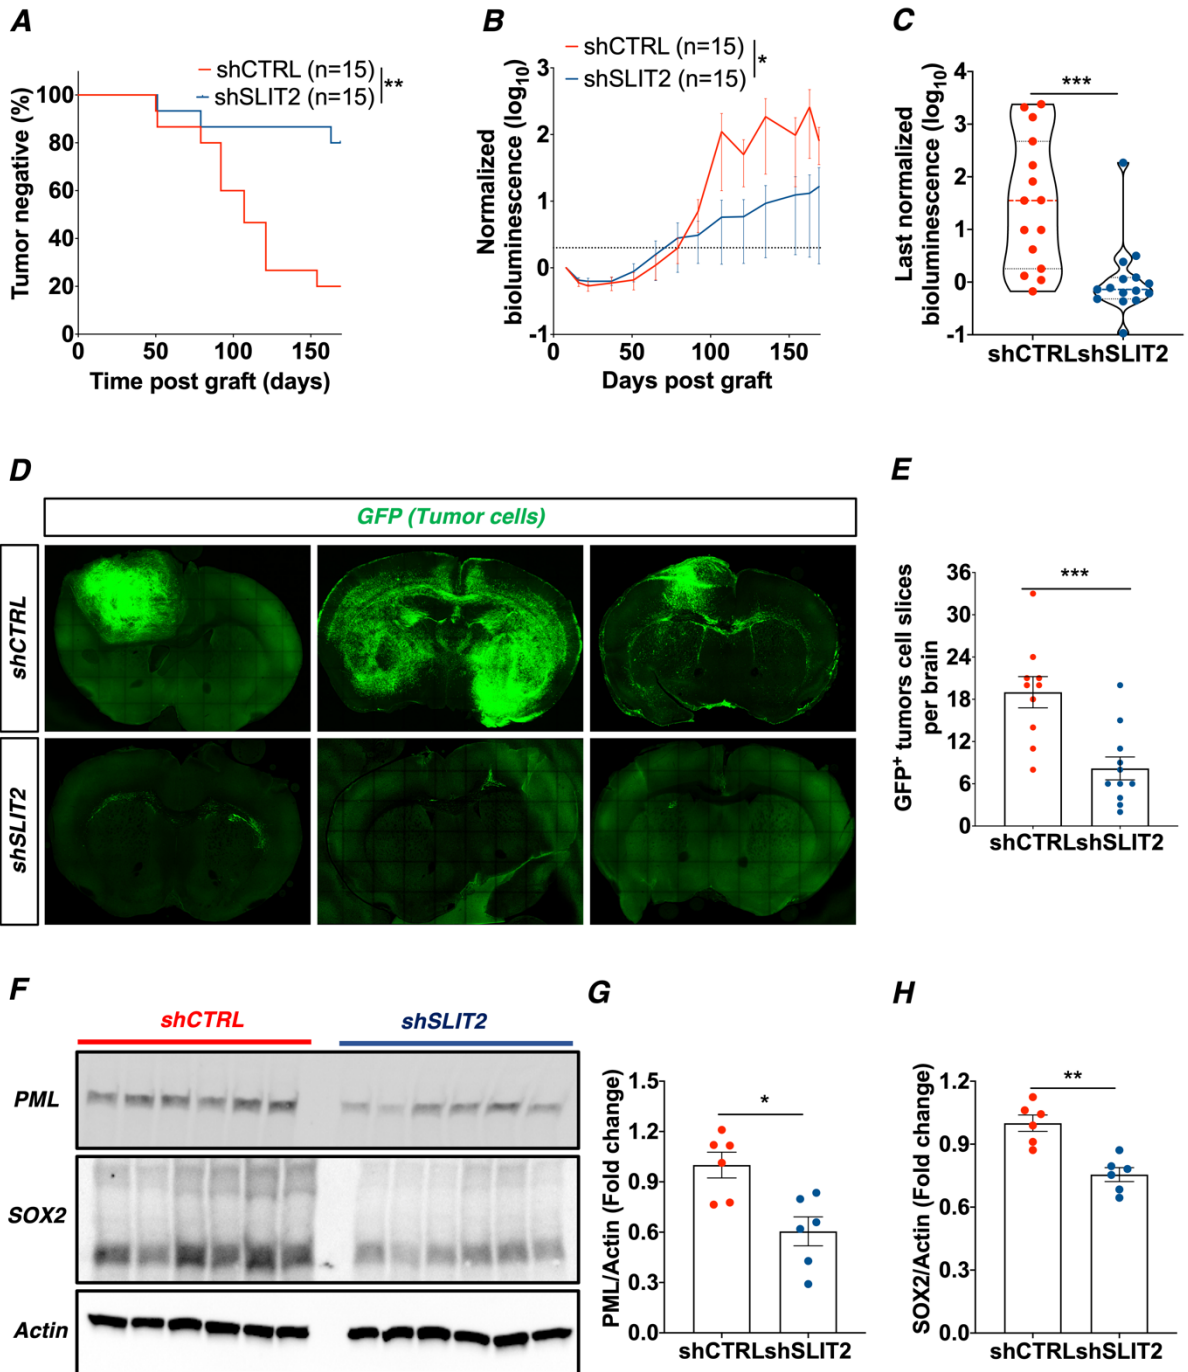

455

456 **Supplemental Figure 4. *SLIT2* silencing slows tumor growth in a GBM Patient-**  
 457 **derived Xenograft (PDX) model.**

458 **A.** Tumor development curve after injection of shCTRL and shSLIT2 N15-0460 GBM

459 patient-derived cells in nude mice ( $n = 15$  mice per group, log-rank test). **B.**



460 bioluminescence signal over time after tumor injection ( $n = 15$  mice per group, One-way  
461 ANOVA). **C.** bioluminescence signal at the end-point of experiment for each of the  
462 injected mice ( $n = 15$  mice per group, Mann-Whitney U test). **D.** Tile-scan images of  
463 vibratome sections from implanted mice demonstrating GFP<sup>+</sup> tumor cell spread. **E.**  
464 Quantification of GFP<sup>+</sup> tumor cell spread ( $n = 10$  shCTRL and 11 shSLIT2 mice, Mann-  
465 Whitney U test). **F-H.** Western blot analysis (**F**) and protein quantification of PML (**G**)  
466 and SOX2 (**H**) expression in shCTRL and shSLIT2 N15-0460 GBM cells ( $n = 6$ , Mann-  
467 Whitney U test, Actin blot is the same as in Supplemental Figure 3A). Data are presented  
468 as mean  $\pm$  s.e.m. \*  $P < 0.05$ , \*\*  $P < 0.01$ , \*\*\*  $P < 0.001$ .

469

470

471

472

473

474

475

476

477

478

479

480

481

482

483

484

**Supplemental Figure 5**

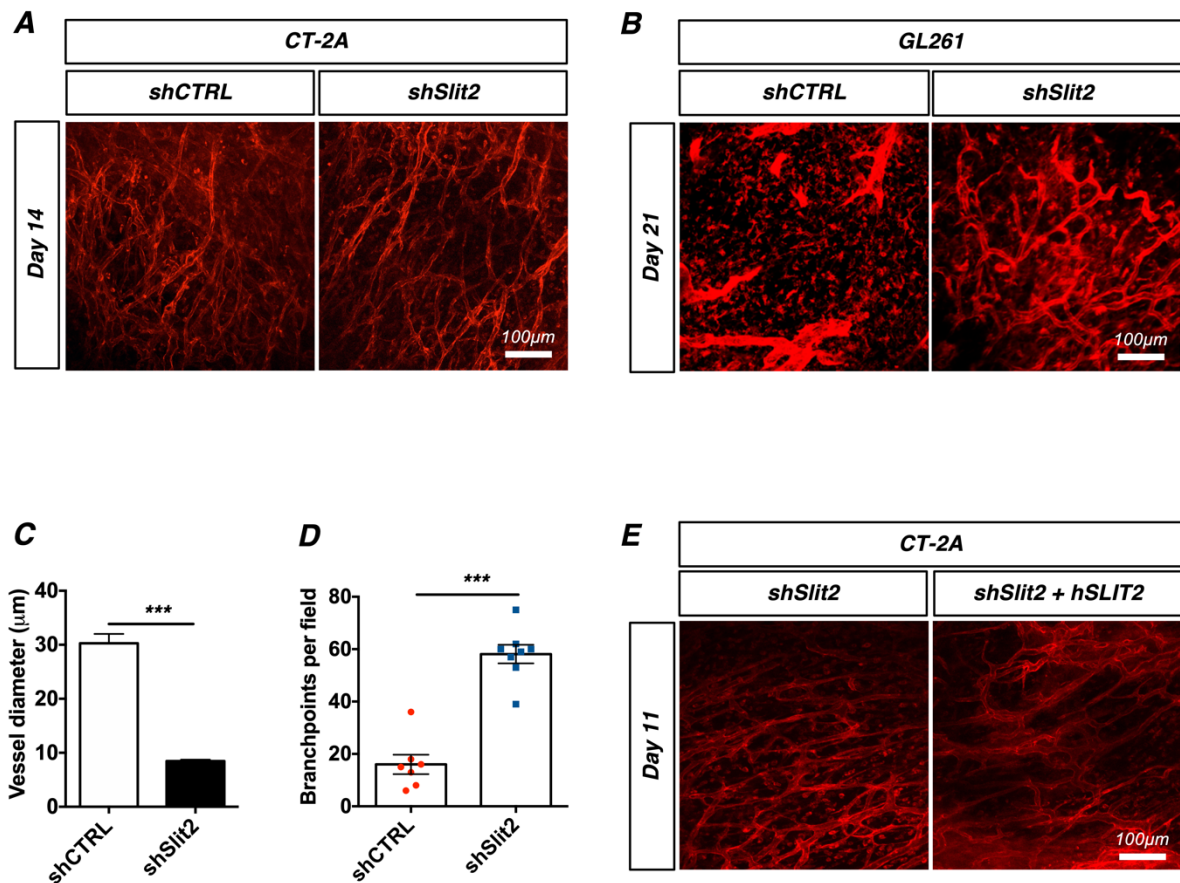

485

486 **Supplemental Figure 5. Slit2 drives vessel dysmorphia and vascular dysfunction in**  
487 **CT-2A and GL261 glioma models.**

488 **A.** *In vivo* two-photon imaging of ROSA<sup>mTmG</sup> mice bearing day 14 CT-2A shCTRL or  
489 shSlit2 tumors. **B.** *In vivo* two-photon imaging of ROSA<sup>mTmG</sup> mice bearing day 21 GL261  
490 shCTRL or shSlit2 tumors. **C-D.** Quantification of blood vessel diameter (**C**) and  
491 branchpoints (**D**) of the GL261 tumors shown in (**B**) ( $n = 7$  mice per group, Student's t-  
492 test). **E.** *In vivo* two-photon imaging of ROSA<sup>mTmG</sup> mice bearing day 11 CT-2A shSlit2  
493 or shSlit2+hSLIT2 tumors. Data are presented as mean  $\pm$  s.e.m. \*  $P < 0.05$ , \*\*  $P < 0.01$ ,  
494 \*\*\*  $P < 0.001$

495

496

## Supplemental Figure 6

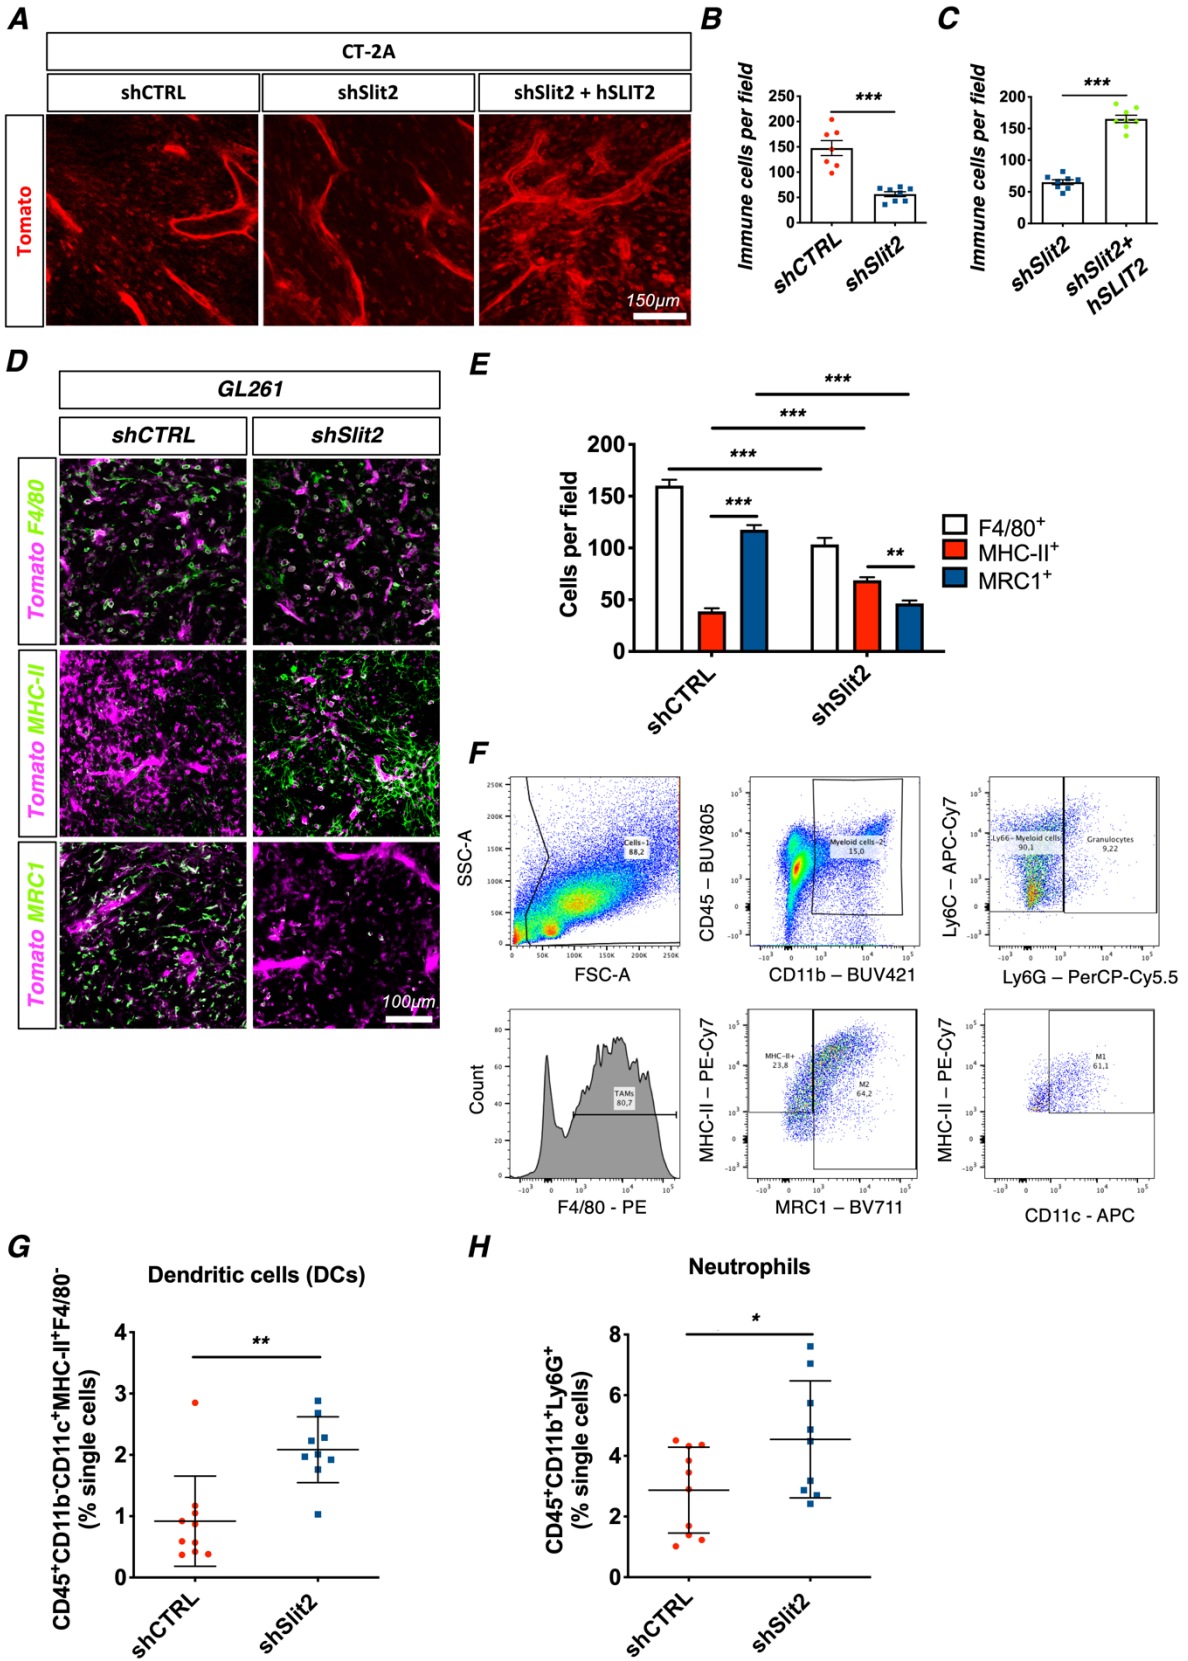

498 **Supplemental Figure 6. Slit2 silencing favors macrophage cytotoxic polarization in**  
499 **CT-2A and GL261 glioma models.**

500 **A-C.** *In vivo* imaging (**A**) and quantification (**B-C**) of host-derived tumor infiltrating  
501 immune cells (red) in late-stage CT-2A tumors ( $n = 7$  shCTRL,  $n = 8$  shSlit2 and  
502 shSlit2+hSLIT2 mice, Student's t-test). **D.** Immunohistochemistry on sections of day 21  
503 GL261 shCTRL or shSlit2 tumors with antibodies recognizing F4/80, MHC-II and MRC1  
504 (green). **E.** Quantifications of (**D**) ( $n = 7$  mice per group, 5 fields per tumor, Two-Way  
505 ANOVA). **F.** Flow cytometry-gating strategy example for macrophage counting shown  
506 in **Figure 4C-E**. **G-H.** FACS quantification of Dendritic Cells (**G**, DCs,  
507 CD45<sup>+</sup>CD11b<sup>+</sup>CD11c<sup>+</sup>MHC-II<sup>+</sup>F4/80<sup>-</sup>) and Neutrophils (**H**, CD45<sup>+</sup>CD11b<sup>+</sup>Ly6G<sup>+</sup>).  
508 Data are presented as mean  $\pm$  s.e.m. \*  $P < 0.05$ , \*\*  $P < 0.01$ , \*\*\*  $P < 0.001$ .

509

510

511

512

513

514

515

516

517

518

519

520

521

522

**Supplemental Figure 7**

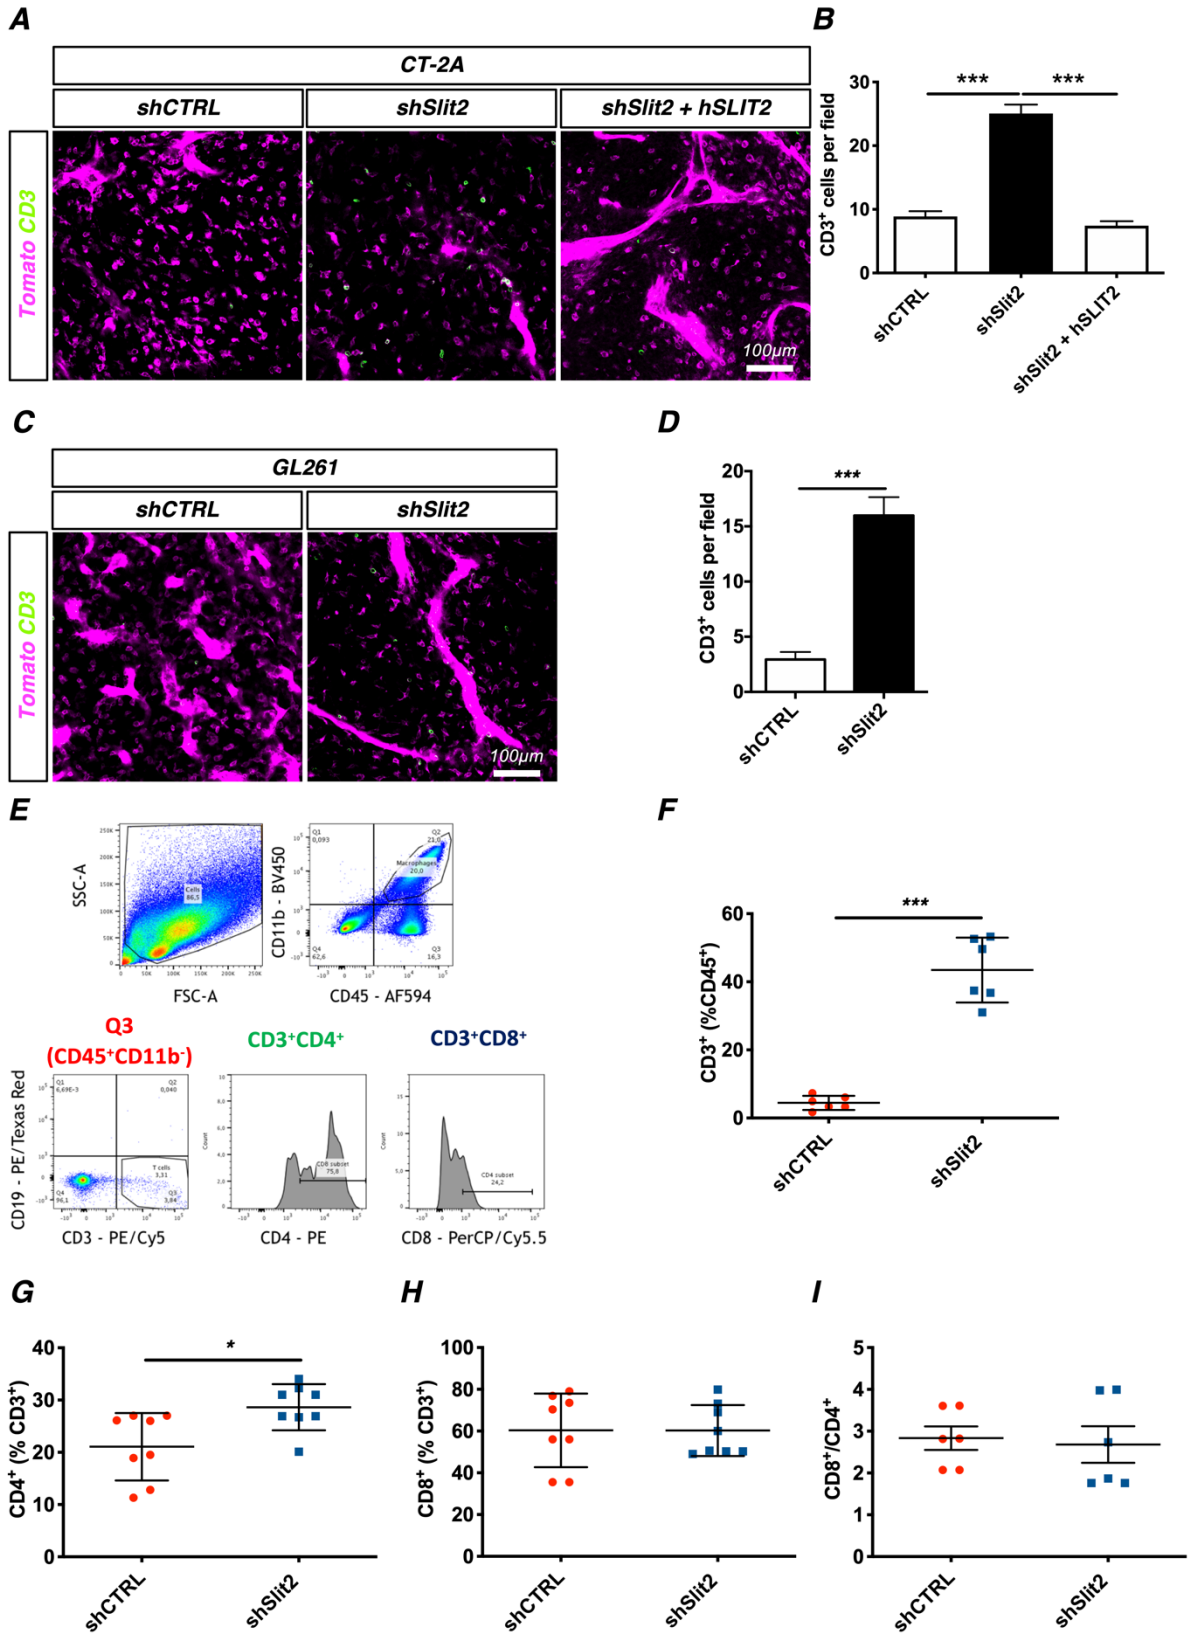

524 **Supplemental Figure 7. Slit2 drives T cell depletion in CT-2A and GL261 models.**

525 **A.** Anti-CD3 staining (green) on sections of late stage CT-2A shCTRL, shSlit2 or  
526 shSlit2+hSLIT2 tumors. **B.** Quantification of **(A)** ( $n = 7$  mice per group, 5 fields per  
527 tumor, One-Way ANOVA). **C.** Anti-CD3 staining (green) on sections of late stage GL261  
528 shCTRL and shSlit2 tumors. **D.** Quantification of **(C)** ( $n = 7$  mice per group, 5 fields per  
529 tumor, Student's t-test). **E-H.** Extension of flow-cytometry analysis from **Figure 5**. When  
530 considering only the immune cell compartment of the tumor microenvironment ( $CD45^+$   
531 cells), there is a 10-fold increase in the proportion of TALs (from 4.4% to 43.5%) in  
532 shSlit2 tumors **(F)**. Analysis of the percentage of  $CD4^+$  T helper cells **(G)** and  $CD8^+$   
533 cytotoxic T cells **(H)** among the TALs ( $n = 8$  mice per group, Mann-Whitney). **I.** Ratio  
534 between  $CD8^+$  and  $CD4^+$  TALS ( $n = 8$  mice per group, Mann-Whitney). Data are  
535 presented as mean  $\pm$  s.e.m. \*  $P < 0.05$ , \*\*  $P < 0.01$ , \*\*\*  $P < 0.001$ .

536

537

538

539

540

541

542

543

544

545

546

547

548

**Supplemental Figure 8**

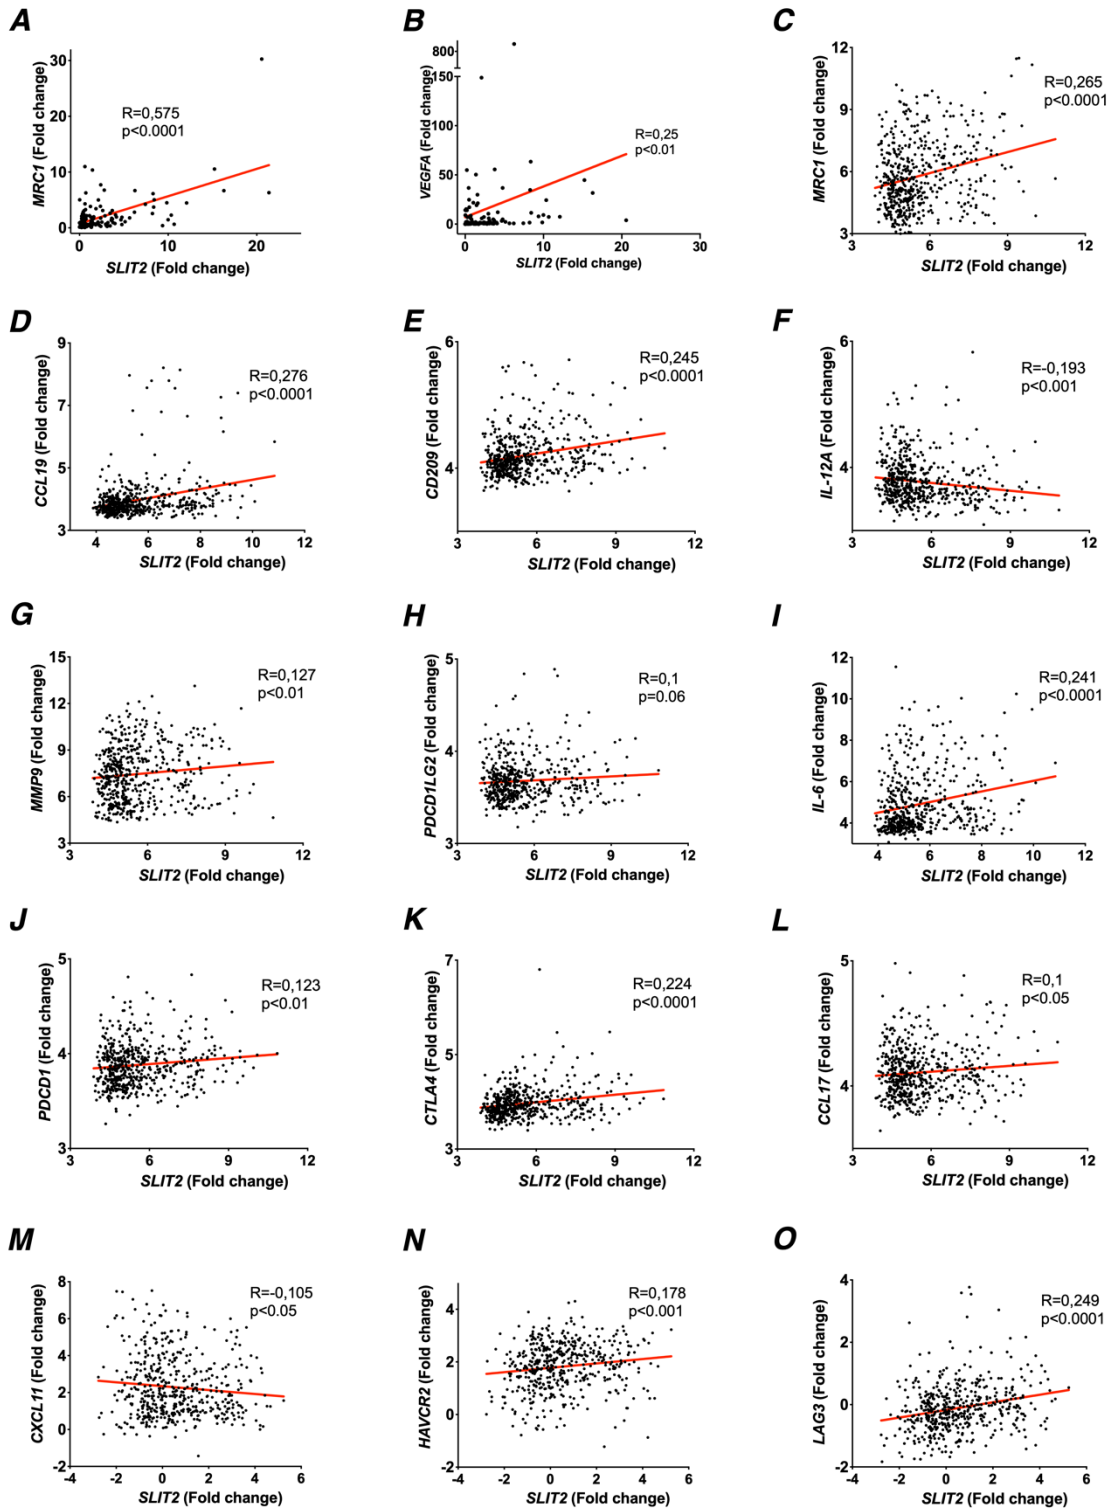

550 **Supplemental Figure 8. SLIT2 expression correlated with immunosuppression in**  
551 **GBM patients.**

552 **A-B.** Correlation analysis of *MRC1* (**A**) or *VEGFA* (**B**) and *SLIT2* expression in GBM  
553 patients ( $n = 129$  patients, Spearman's correlation test). **C-O.** Correlation analysis of  
554 *SLIT2* expression with the indicated genes in GBM patients from TCGA cohort ( $n = 489$   
555 patients, Spearman's correlation test). \*  $P < 0.05$ , \*\*  $P < 0.01$ , \*\*\*  $P < 0.001$ .

556

557

558

559

560

561

562

563

564



## Supplemental Figure 9

**A**

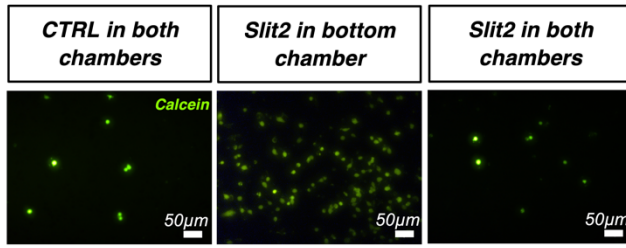

**B**

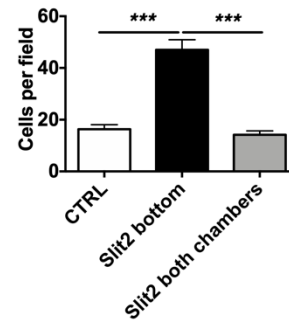

**C**

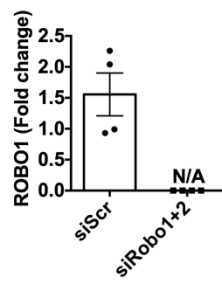

**D**

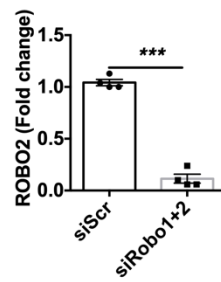

**E**

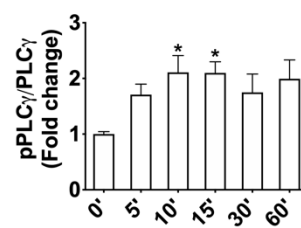

**F**

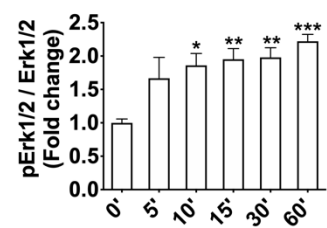

**G**

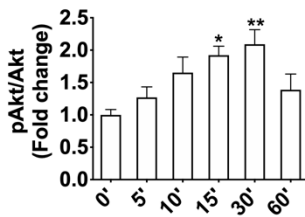

**H**

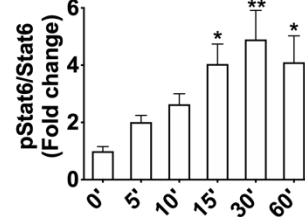

**I**

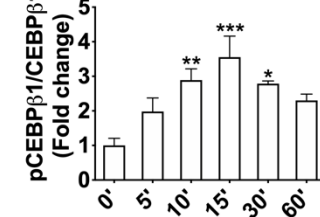

**J**

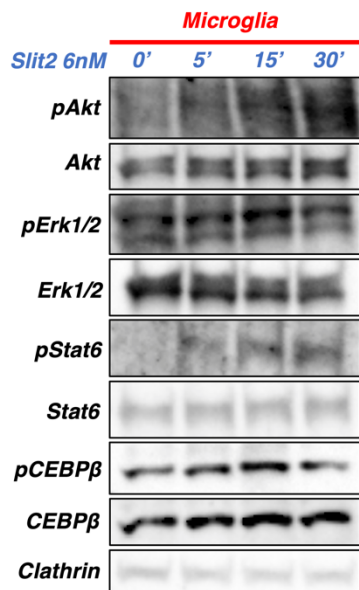

**K**

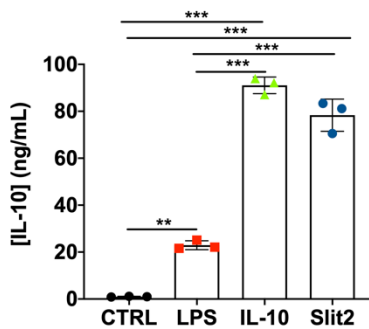

**L**

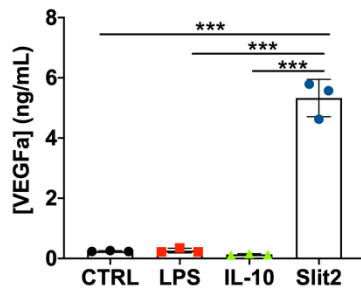

566 **Supplemental Figure 9. Slit2 induces chemotactic migration and signaling in**  
567 **primary macrophages and microglial cells.**

568 **A-B.** Representative images (**A**) of calcein-stained (green) Transwell assays with Slit2  
569 treatment in the bottom chamber or in both chambers and quantification (**B**). Slit2-  
570 induced migration is chemotactic, as treatment with Slit2 in both chambers disrupts the  
571 gradient and abrogates migration ( $n = 4$ , One-way ANOVA). **C-D.** qPCR analysis of  
572 Robo1 (**C**) and Robo2 (**D**) expression after siRNA treatment of cultured RAW264.7  
573 macrophages for 72hs ( $n = 4$ , Mann Whitney). **E-I.** Quantifications of the Western Blots  
574 shown in **Figure 6F**. ( $n = 6$ , One-Way ANOVA). **J.** Western blot analysis of Slit2  
575 downstream signaling in cultured microglial cells ( $n = 3$ ). **K-L.** ELISA from conditioned  
576 medium from LPS or Slit2-treated microglial cells quantifying the secretion of IL-10 (**K**)  
577 and VEGFa (**L**) ( $n = 3$  independent cultures, Mann-Whitney U test). Data are presented  
578 as mean  $\pm$  s.e.m. \*  $P < 0.05$ , \*\*  $P < 0.01$ , \*\*\*  $P < 0.001$ .

579

580

581

582

583

**Supplemental Figure 10**

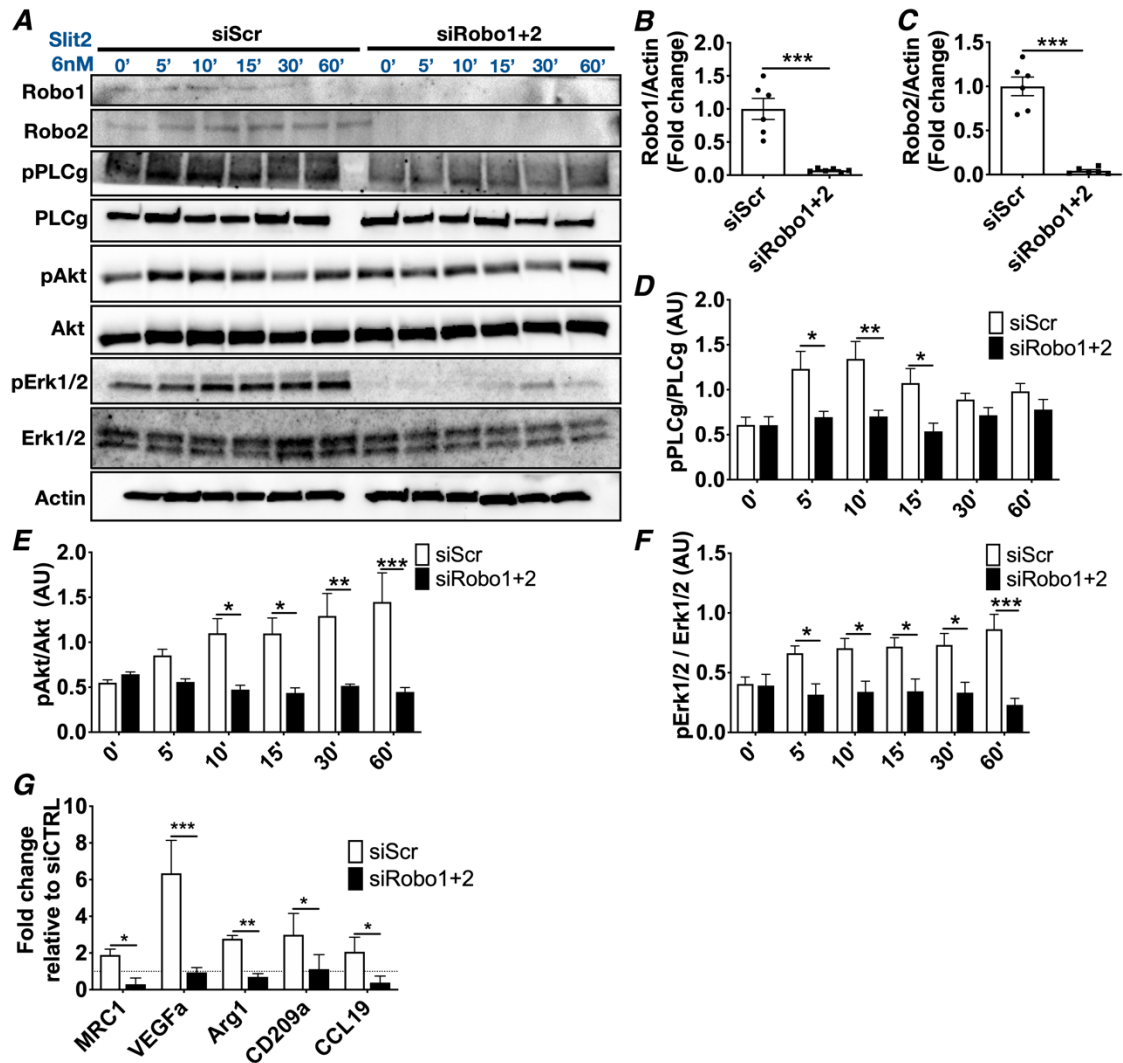

584 Supplemental Figure 10. Slit2 induces macrophage migration and downstream  
 585 signaling via Robo1/2.

586 A. Western blot analysis of PLCγ, Akt and Erk1/2 phosphorylation induced by Slit2 in  
 587 control and Robo1/2 knockdown RAW264.7 macrophages ( $n = 5$ ). B-C. Quantification  
 588 of Robo1 (A) and Robo2 (B) protein expression after Robo1 and Robo2 knockdown. D-  
 589 F. Quantification of (A) ( $n = 5$ , Two-way ANOVA). G. qPCR analysis of genes related  
 590 to the tumor supportive phenotype (*Mrc1*, *Vegfa*, *Arg1*, *Cd209a* and *Ccl19*) in RAW264.7  
 591 macrophages after Robo1 and Robo2 knockdown and Slit2 treatment ( $n = 4$ , Mann  
 592 Whitney U test). Data are presented as mean  $\pm$  s.e.m. \*  $P < 0.05$ , \*\*  $P < 0.01$ , \*\*\*  $P <$   
 593 0.001.

## Supplemental Figure 11

**A**

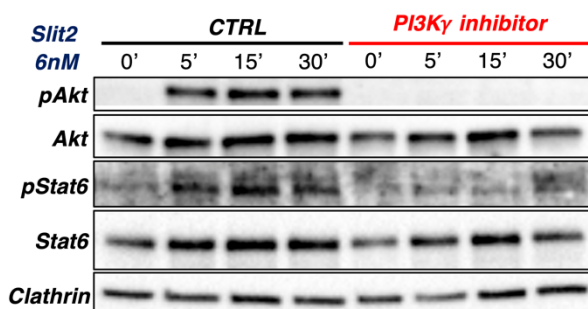

**B**

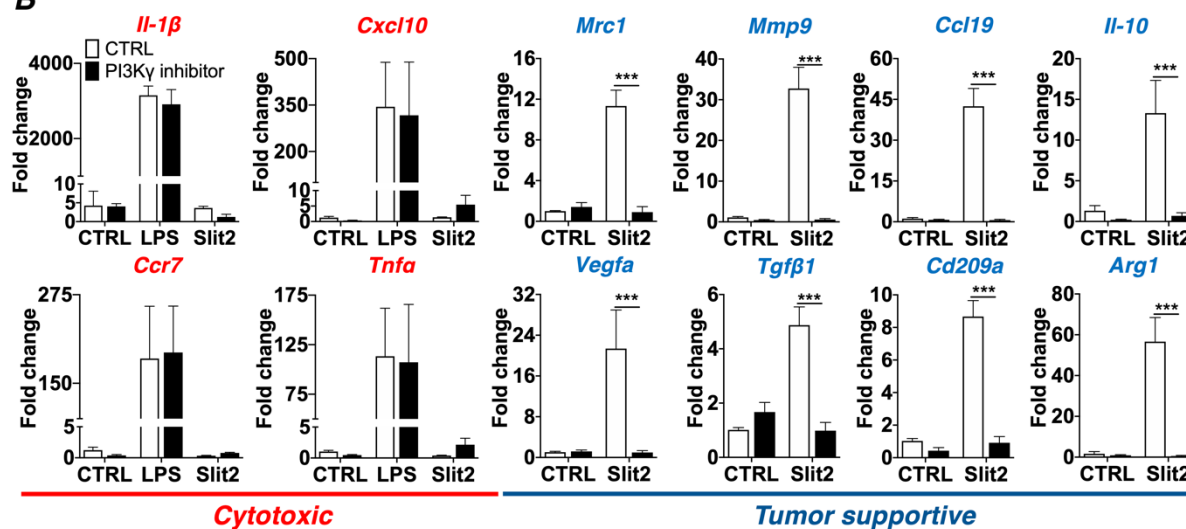

594

595 Supplemental Figure 11. PI3Kγ inhibitor disrupts Slit2-induced macrophage and  
596 microglia polarization.

597 A. WB analysis of Akt and Stat6 phosphorylation in BMDMs induced by Slit2 after  
598 PI3Kγ inhibitor IPI-549 pretreatment ( $n = 3$  independent cultures). B. qPCR analysis of  
599 microglial cultures following Slit2 or LPS treatment after pre-treatment with PI3Kγ  
600 inhibitor ( $n = 4$  independent cultures, 2-way ANOVA). Data are presented as mean  $\pm$   
601 s.e.m. \*  $P < 0.05$ , \*\*  $P < 0.01$ , \*\*\*  $P < 0.001$ .

602

603

604

### Supplemental Figure 12

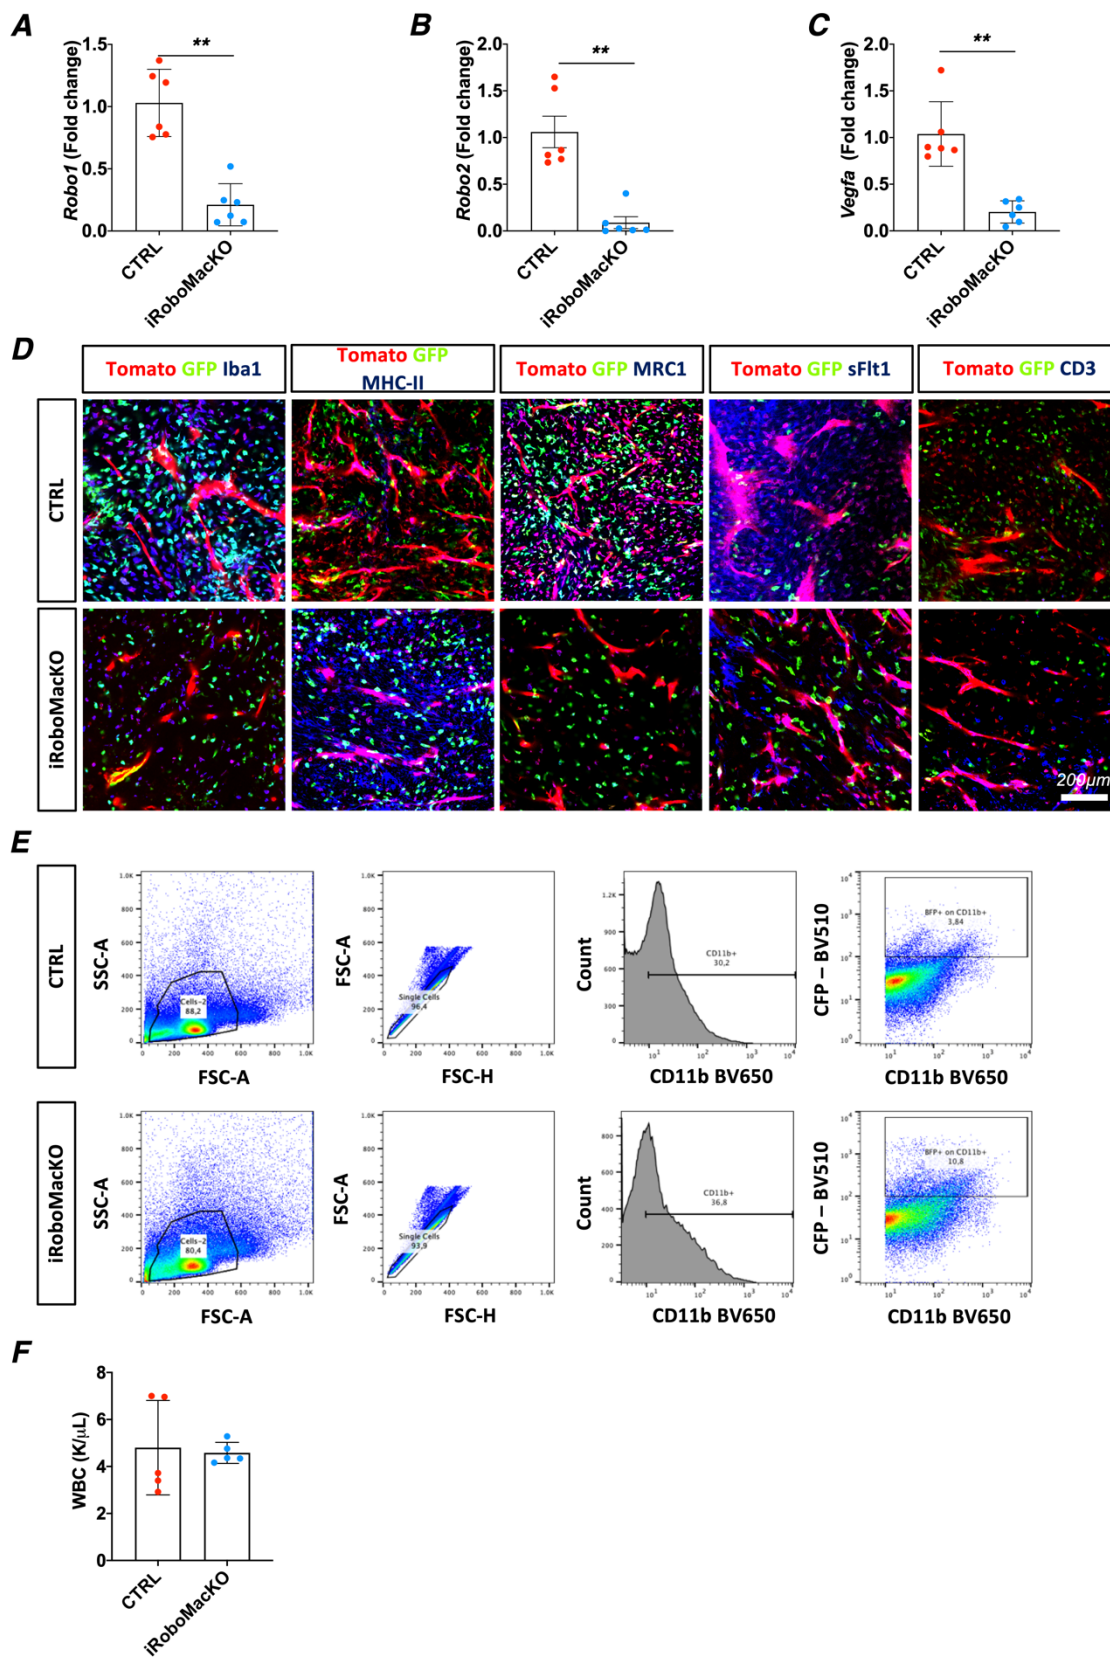

606 **Supplemental Figure 12. Analysis of iRoboMacKO**

607 **A-C.** qPCR of Robo1 (**A**), Robo2 (**B**) and Vegfa (**C**) in GFP<sup>+</sup> macrophages extracted  
608 from the bone-marrow of CTRL and iRoboMacKO tumor-bearing mice 21 days after  
609 tumor implantation. **D.** Immunohistochemistry images related to quantifications shown  
610 in **Figure 8I-K**. **E.** Flow cytometry-gating strategy example for graphs shown in **Figure**  
611 **8M-N**. **F.** Total white blood cells (WBC) counts from peripheral blood of late-stage  
612 CTRL and iRoboMacKO tumor-bearing mice ( $n = 5$  mice/group; Mann-Whitney U test).  
613 Data are presented as mean  $\pm$  s.e.m. \*  $P < 0.05$ , \*\*  $P < 0.01$ , \*\*\*  $P < 0.001$ .

614

615

616

617

618

619

620

621

622

623

624

625

626

627

628

629

630

**Supplemental Figure 13**

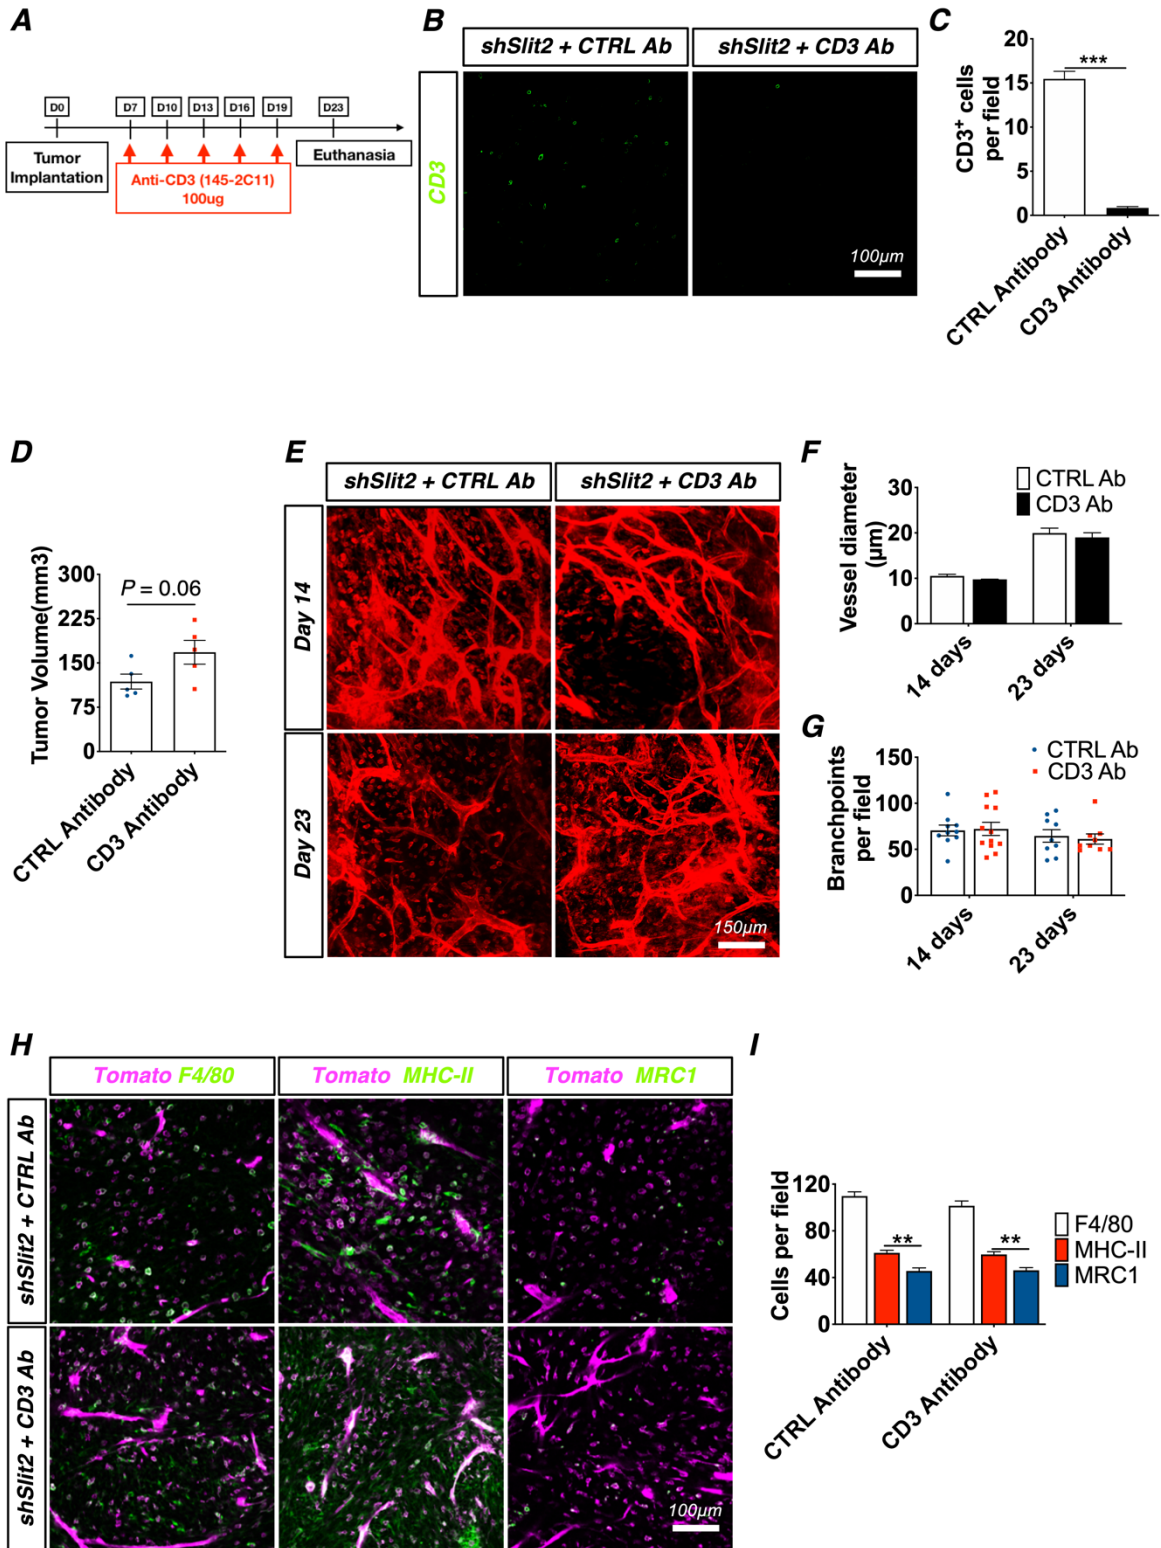

632 **Supplemental Figure 13. *In vivo* T cell-depletion does not affect the TME.**

633 **A.** Experimental design for T cell depletion by intravenous injection with 145-2C11 anti-  
634 CD3 antibodies (mice were treated with 100ug of 145-2C11 antibodies every 3 days  
635 starting 7 days after tumor implantation). **B.** CD3 immunostainings performed on sections  
636 of late stage CT-2A tumors. **C.** Quantification from **(B)** ( $n = 5$  mice per group, 5 fields  
637 per staining, Student's t test). **D.** Tumor volume quantification at 23 days following anti-  
638 CD3 mAb treatment ( $n = 5$  mice per group, Mann-Whitney U test). **E.** *In vivo* two-photon  
639 imaging of ROSA<sup>mTmG</sup> mice bearing early (14 days) and late stage (23 days) CT-2A  
640 shSlit2 tumors with or without anti-CD3 mAb treatment. **F-G.** Quantification of Blood  
641 vessel diameter **(F)** and branchpoints **(G)** from **€** ( $n = 5$  mice per group, One-way  
642 ANOVA). **H.** F4/80, MHC-II and MRC1 Immunohistochemistry on sections of late stage  
643 (23 days) CT-2A shSlit2 tumors treated with control mAb or anti-CD3 mAb. **I.**  
644 Quantification from **(H)**,  $n = 5$  mice per group, 5 fields per tumor, Two-way ANOVA).  
645 Data are presented as mean  $\pm$  s.e.m. \*  $P < 0.05$ , \*\*  $P < 0.01$ , \*\*\*  $P < 0.001$ .

646

647

648

649

650

651

652

653

654

655

656



**Supplemental Figure 14**

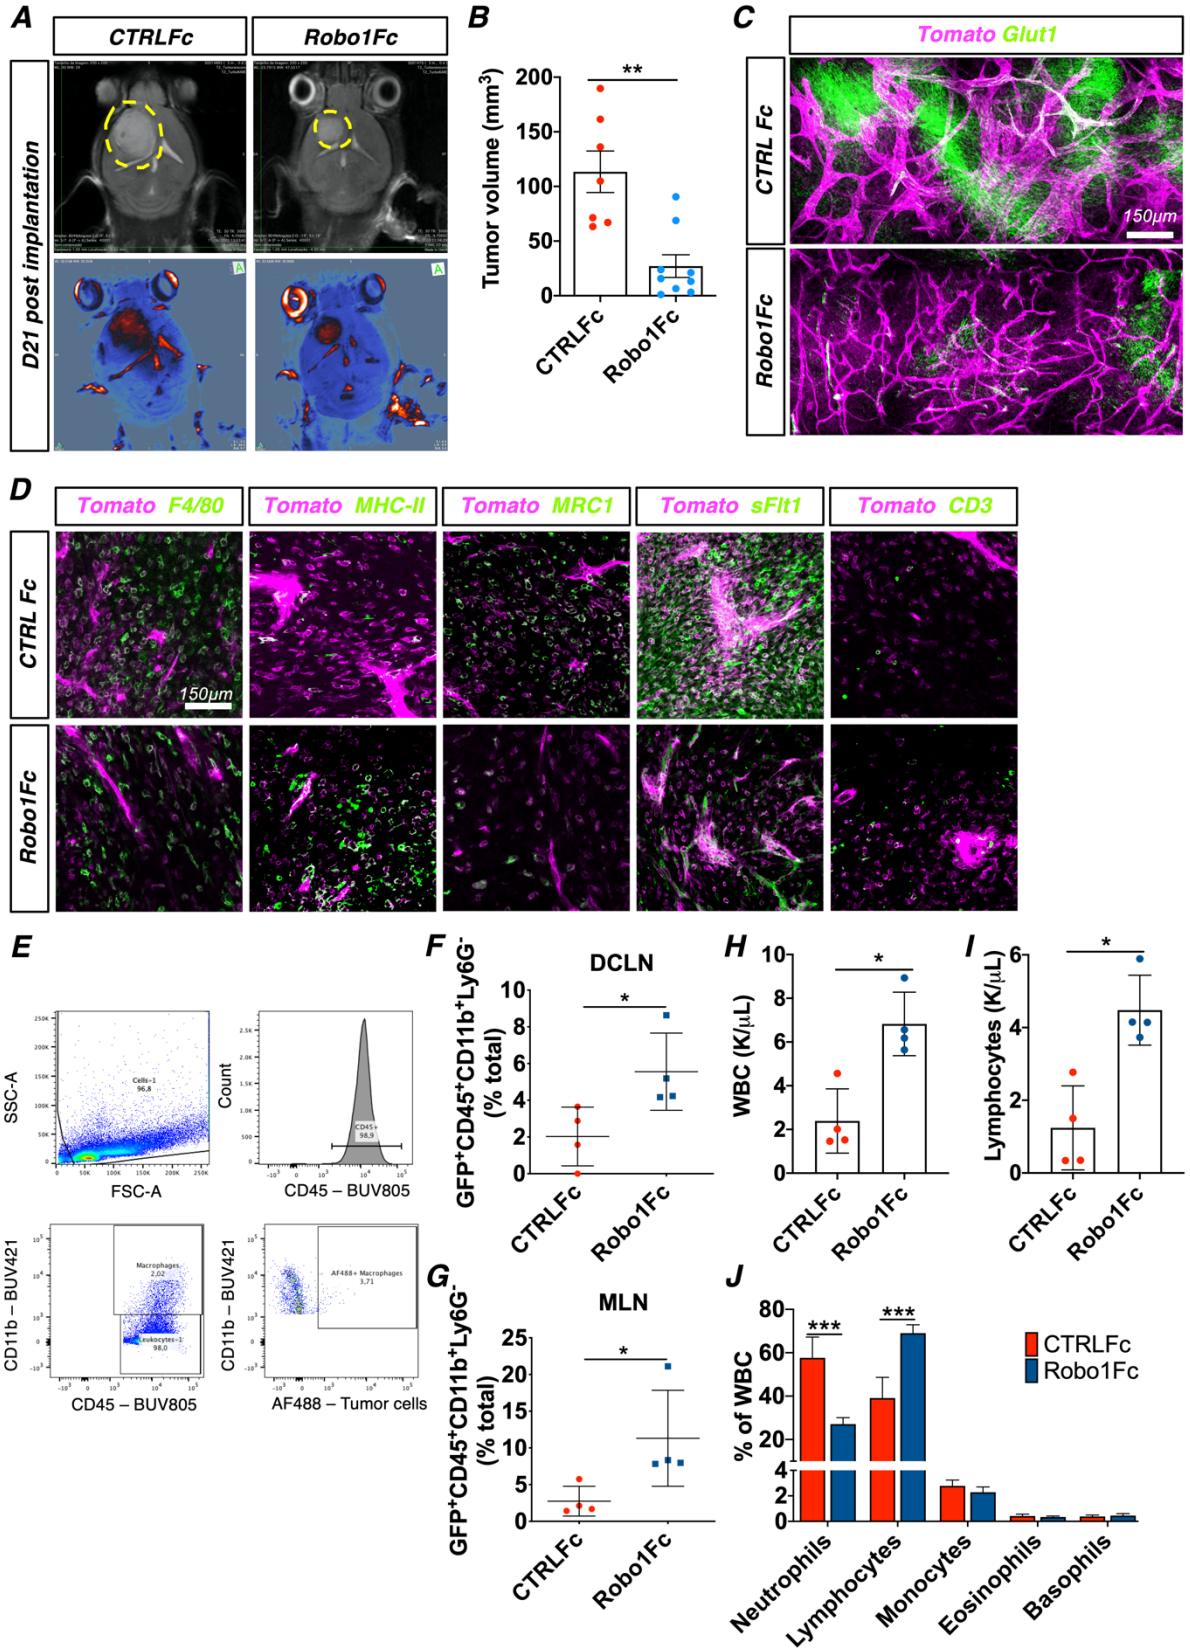

658 **Supplemental Figure 14. Robo1Fc treatment slowed GBM growth by inducing**  
659 **systemic long-term anti-tumor immune responses.**

660 **A.** T2-weighted post-gadolinium MRI images of CTRLFc and Robo1Fc treated mice 21  
661 days after tumor implantation. **B.** Quantification of tumor size from **(A)** ( $n = 7$  CTRLFc  
662 and 9 Robo1Fc tumors). **C.** Immuno-staining for Glut1 (quantified in **Figure 9H**). **D.**  
663 Immunohistochemistry images related to quantifications shown in **Figure 9I-K**. **E.** Flow  
664 cytometry-gating strategy example for graphs shown in **(F-G)**. **F-G.** FACS analysis of  
665 deep cervical and mandibular lymph nodes (DCLN and MLN, respectively) from late-  
666 stage CTRLFc- and Robo1Fc-treated mice ( $n = 4$  mice/group; Mann-Whitney U test).  
667 **H-J.** Total white blood (WBC, **H**), lymphocyte (**I**) and differential WBC (**J**) counts from  
668 peripheral blood of late-stage CTRLFc- and Robo1Fc-treated tumor-bearing mice ( $n = 4$   
669 mice/group; Mann-Whitney U test and Two-way ANOVA). Data are presented as mean  
670  $\pm$  s.e.m. \*  $P < 0.05$ , \*\*  $P < 0.01$ , \*\*\*  $P < 0.001$ .

671

| Primer           | Cat No     |
|------------------|------------|
| Hs_ROBO3_1_SG    | QT00055951 |
| Hs_ROBO2_2_SG    | QT01007664 |
| Hs_ROBO4_1_SG    | QT00237741 |
| Hs_SLIT2_1_SG    | QT00007784 |
| Hs_SLIT3_1_SG    | QT00018795 |
| Hs_SLIT1_1_SG    | QT00071113 |
| Hs_ROBO1_2_SG    | QT01668982 |
| Hs_ACTB_1_SG     | QT00095431 |
| Mm_ACTB_1_SG     | QT00095242 |
| Mm_GAPDH_3_SG    | QT01658692 |
| Mm_CCR7_1_SG     | QT00240975 |
| Mm_MRC1_1_SG     | QT00103012 |
| Mm_VEGFA_1_SG    | QT00160769 |
| Mm_CCL19_2_SG    | QT02532173 |
| Mm_TNF_1_SG      | QT00104006 |
| Mm_MMP9_1_SG     | QT00108815 |
| Mm_TGFB1_1_SG    | QT00145250 |
| Mm_IL1B_2_SG     | QT01048355 |
| Mm_PDCD1IG1_1_SG | QT00148617 |
| Mm_PDCD1IG2_1_SG | QT00136640 |
| Mm_CXCL10_1_SG   | QT00093436 |
| Mm_IL12B_1_SG    | QT00153643 |
| Mm_CD209A_1_SG   | QT00116312 |
| Mm_ARG1_1_SG     | QT00134288 |
| Mm_IL10_1_SG     | QT00106169 |
| Mm_IL12M_1_SG    | QT00101108 |
| Mm_IL2_1_SG      | QT00112315 |
| Mm_CXCL11_1_SG   | QT00265041 |
| Mm_IL17A_1_SG    | QT00103278 |
| Mm_IFNg_1_SG     | QT01038821 |
| Mm_CCL17_1_SG    | QT00131572 |
| Mm_PDCD1_1_SG    | QT00111111 |
| Mm_ROBO1_1_SG    | QT00146853 |
| Mm_SLIT1_1_SG    | QT01044925 |
| Mm_SLIT2_1_SG    | QT00163828 |
| Mm_SLIT3_1_SG    | QT00283416 |
| Mm_ROBO3_1_SG    | QT00136605 |
| Mm_ROBO2_1_SG    | QT00143255 |

672

673 **Supplemental Data Table. 1.** List of qPCR Primers used in this study.

674

675
